1

1 **Enriching neural stem cell and pro-healing glial phenotypes with electrical**  
2 **stimulation after traumatic brain injury in male rats**

3 Eunyoung Park,<sup>1</sup> Johnathan G. Lyon<sup>2</sup>, Melissa Alvarado-Velez<sup>3</sup>, Martha I. Betancur<sup>2</sup>, Nassir  
4 Mokarram<sup>2</sup>, Jennifer H. Shin,<sup>1\*</sup> and Ravi V. Bellamkonda<sup>2\*</sup>

5

6 **Institutional Affiliation**

7 1 Department of Mechanical Engineering, Korea Advanced Institute of Science and  
8 Technology, 291, Daehak-ro, Daejeon 34141, Republic of Korea.

9 2 Department of Biomedical Engineering, Pratt School of Engineering, Duke University, 101  
10 Science Drive, Durham NC 27705, USA

11 3 The Wallace H. Coulter Department of Biomedical Engineering, Georgia Institute of  
12 Technology, 313 Ferst Dr NW, Atlanta, GA 30332, USA

13

14 **Key words:** Electrical stimulation, traumatic brain injury, microglia, neural stem cell,  
15 astrocyte, RRID:RGD\_734476, RRID:AB\_2571567, RRID:AB\_2282664, RRID:  
16 AB\_10013382, RRID:AB\_2291300, RRID:AB\_1523910,RRID: AB\_2734747,  
17 RRID:AB\_2650601, RRID:SCR\_002285, RRID:AB\_312800, RRID: AB\_10893200,  
18 RRID:SCR\_008520, RRID:SCR\_002798

19

20 **Support or grant information:**

21 KAIST-funded Global Singularity Research Program 2020

22 National Institute of Neurological Disorders and Stroke (NINDS), of the National Institutes of  
23 Health (NIH): R01NS079739-05.

24

25 **\*Corresponding Authors:**

Ravi V Bellamkonda

305 Teer Building

Box 90271

Durham, NC USA 27708-0271

919-660-5389

[ravi@duke.edu](mailto:ravi@duke.edu)

Jennifer H. Shin

KAIST

291 Daehak-ro

Daejeon 34141, Republic of Korea

+82-42-350-3232

[j\\_shin@kaist.ac.kr](mailto:j_shin@kaist.ac.kr)

26

27 **Abstract**

28 Traumatic Brain Injury (TBI) by an external physical impact results in compromised brain  
29 function via undesired neuronal death. Following the injury, resident and peripheral immune  
30 cells, astrocytes, and neural stem cells (NSCs) cooperatively contribute to the recovery of the  
31 neuronal function after TBI. However, excessive pro-inflammatory responses of immune cells,  
32 and the disappearance of endogenous NSCs at the injury site during the acute phase of TBI,  
33 can exacerbate TBI progression leading to incomplete healing. Therefore, positive outcomes  
34 may depend on early interventions to control the injury-associated cellular milieu in the early  
35 phase of injury. Here, we explore electrical stimulation (ES) of the injury site in a rodent model  
36 (male Sprague-Dawley rats) to investigate its overall effect on the constituent brain cell  
37 phenotype and composition during the acute phase of TBI. Our data showed that a brief ES for  
38 1h on day 2 of TBI promoted pro-healing phenotypes of microglia as assessed by CD206  
39 expression and increased the population of NSCs and Nestin<sup>+</sup> astrocytes at 7 days post-TBI.  
40 Also, ES effectively increased the number of viable neurons when compared to the  
41 unstimulated control group. Given the salience of microglia and neural stem cells for healing  
42 after TBI, our results strongly support the potential benefit of the therapeutic use of ES during  
43 the acute phase of TBI to regulate neuroinflammation and to enhance neuroregeneration.

44

45 **Significance Statement**

46 Traumatic brain injury (TBI) occurs when a head injury leads to a disruption of normal function  
47 in the brain and is a major cause of death and disability, worldwide. The authors used electrical  
48 stimulation during the acute phase of TBI, which promoted pro-healing phenotypes of  
49 microglia and increased the number of neural stem cells and Nestin<sup>+</sup> astrocytes, thereby  
50 enhancing neuronal viability. These findings support further study of electrical stimulation to  
51 regulate neuroinflammation and to enhance neuroregeneration after TBI.

52

53

## 54 INTRODUCTION

55 Traumatic Brain Injury (TBI) occurs when an external physical impact results in compromised  
56 brain function. The pathophysiological processes in TBI include physical damage to the skull  
57 and blood-brain barrier (BBB), immune cell activation, and neuronal impairment. In mild TBI—  
58 where the injury-associated disorientation or unconsciousness is shorter than 30 minutes  
59 (National Center for Injury Prevention and Control (U.S.), 2003)—the brain tissue undergoes a  
60 natural healing process with controlled hemorrhage, followed by recovery of damaged  
61 neuronal function. During the healing process, a well-orchestrated response of immune cells  
62 within the injury microenvironment is hypothesized to facilitate the recovery of a dysfunctional  
63 brain. On the other hand, severe TBI—where the injury-associated neurological states exceed  
64 24 hours as a result of injury of substantial size or damage to a critical brain region—overwhelms  
65 one's self-healing capability, leading to lasting disability and neural dysfunction.

66 At the cellular level, multiple cell types contribute to the progression and recovery of  
67 the injured brain after TBI (Simon et al., 2017). Primarily, necrotic death and structural  
68 disruptions in both neuronal and non-neuronal cells occur at the moment of impact. During the  
69 initial immune response to this damage, microglia, the resident immune cells in the brain,  
70 become activated by distressed cells in the injury microenvironment. Peripheral cells, including  
71 leukocytes (e.g., neutrophils and monocytes), T-cells, and dendritic cells, home to the injury—  
72 a process typically enhanced when an injury to the BBB is incurred. Astrocytes, one of the  
73 most abundant cells in the brain, also become activated in pathological responses. Interestingly,  
74 neural stem cells (NSCs), typically found during development as parental cells to many brain  
75 cells, are also found after brain injury. These NSCs possibly serve to replace the damaged cells  
76 and/or to alter the deleterious microenvironment toward a more neuroprotective one through  
77 secretion of favorable soluble factors (Bond, Ming, & Song, 2015). Nevertheless, in severe  
78 cases, long-lasting inflammatory reactions would lead to substantial neurodegeneration.

79 This chain of cellular responses is dynamic, especially in the early phase of TBI (Figure  
80 S1). For example, the early inflammatory responses, that span over several days, are mostly  
81 driven by resident microglia and infiltrated monocytes and macrophages. These cells are  
82 classified by the M1/M2 paradigm based on signatures of cytokine and chemokine secretion,  
83 reactive oxygen species production, phagocytic activity, and antigens expressions (Loane &  
84 Kumar, 2016). A few recent studies reported the temporal phenotypic switching of the immune  
85 cells from mixed M1/M2 phenotypes to M1 phenotypes in an adult rat TBI (Kumar, Alvarez-  
86 Croda, Stoica, Faden, & Loane, 2016; Simon et al., 2017; Wang et al., 2013). On the other  
87 hand, endogenous NSCs are known to be recruited to the site of cortical injury within one day

88 after TBI while maintaining proliferation and migration from their niche for several days (Itoh,  
89 Satou, Hashimoto, & Ito, 2005; Yi et al., 2013). However, they often die before differentiating  
90 into mature neurons, possibly due to a shortage of factors necessary for their survival and  
91 differentiation (Itoh et al., 2005; Yi et al., 2013). Therefore, these acute cellular changes  
92 inevitably lead to exacerbated TBI progression and incomplete healing.

93 Therefore, modulation of the injury-associated cellular and inflammatory milieu during  
94 the early phase of injury has become a subject of interest. In the recovery of TBI, peripheral  
95 nerve injury, or ischemia, several anti-inflammatory and neuroprotective compounds have  
96 been shown to enhance neuronal survival and structural remodeling by either recruiting M2  
97 immune cells or shifting their states toward M2 (X. Liu et al., 2016; Mokarram & Bellamkonda,  
98 2011; Mokarram et al., 2017). Likewise, in case of endogenous NSCs, pharmacological growth  
99 factors or cytokines have been shown to modulate proliferation, apoptosis, migration, or  
100 differentiation lineage (Addington, Roussas, Dutta, & Stabenfeldt, 2015). In the clinical  
101 application of these pharmacological factors, however, safety issues still remain in the  
102 determination of the most effective dosage and treatment strategy that warrants no detrimental  
103 side effects.

104 As a therapeutic concomitant or alternative to pharmacological approaches, electrical  
105 stimulation (ES) has gained a great deal of attention over the last few decades. In neurological  
106 diseases including chronic pain, depression, Parkinson's disease, and TBI, (Hofer & Schwab,  
107 2019; Limousin et al., 1998; Schiff et al., 2007) the therapeutic application of ES has mainly  
108 focused on the functional recovery of neurons, to some degree neglecting glial cells in the brain  
109 (Otto & Schmidt, 2020). However, ES has the potential to modulate the physiology of many  
110 cell types in the brain (Chen, Bai, Ding, & Lee, 2019). For instance, NSCs have been shown  
111 to exhibit enhanced proliferation, differentiation, and directed migration in response to ES  
112 (Huang, Li, Chen, Zhou, & Tan, 2015; Zhu et al., 2019). Accordingly, several studies have  
113 demonstrated the applicability of ES in NSCs to elicit neurogenesis in peripheral nerve  
114 regeneration (Iwasa et al., 2019), stroke (Xiang et al., 2014), and memory dysfunction (A. Liu,  
115 Jain, Vyas, & Lim, 2015) in animal models.

116 In addition, recent studies have reported the efficacy of ES in the regulation of  
117 neuroinflammation. For example, in painful neuropathy by sciatic nerve transection, ES  
118 treatment ameliorated hyperalgesia by suppressing the activation of both microglia and  
119 astrocytes (Lopez-Alvarez, Cobianchi, & Navarro, 2019). In multiple sclerosis, an autoimmune  
120 disease, ES was shown to polarize macrophages toward M2 phenotypes, ultimately  
121 contributing to remyelination (McLean & Verge, 2016). Moreover, ES treatment following



122 lipopolysaccharide exposure or spinal contusion alleviated microglial activation while  
123 improving neural activity (Hahm, Yoon, & Kim, 2015; Huffman et al., 2019).

124 Despite growing interests in the field, the effects of ES in TBI, on both acute  
125 neuroinflammation and surrounding tissue have not been fully elucidated. This study aims to  
126 investigate the impact of brief ES on the second day of TBI, to induce a pro-healing  
127 biochemical cascade to positively impact brain recovery by enhancing the neuroprotective  
128 responses of immune cells and endogenous NSCs, thereby enhancing neuronal viability.

129

## 130 **METHODS**

### 131 **Surgical Procedures: TBI Induction**

132 All animal studies were approved by the Institutional Animal Care and Use Committee  
133 (IACUC) at Duke University, and protocols were performed following the Guide for the Care  
134 and Use of Laboratory Animals published by the National Institute of Health (NIH). A total of  
135 24 eight-week-old male SAS Sprague-Dawley rats weighing 250-300 g were obtained from  
136 Charles Rivers Labs (CrI:CD(SD), Strain code: 400, RRID:RGD\_734476). All animals  
137 received a craniotomy and controlled cortical impact (CCI), following procedures used in prior  
138 work by our group (Betancur et al., 2017). Briefly, a longitudinal incision was made, and a 5  
139 mm craniotomy was performed 0.5 mm anterior to bregma and 0.5 mm lateral from the sagittal  
140 suture. After removing the bone flap, a 3 mm diameter injury with a depth of 2 mm with a  
141 speed of 4 m/s was made, located at the center of the craniotomy. The severity of CCI is  
142 considered to be moderate to severe. The injury site was covered entirely with a BloodStop  
143 Hemostatic Gauze (Life Science Plus). The skin flaps were subsequently sutured together to  
144 close the wound, and triple antibiotic cream was layered on top of the sutured skin. The animals  
145 received a Buprenorphine (1 mg/kg) injection and were allowed to recover in a new, clean cage.  
146 In all surgical procedures, each rat was anesthetized using 2 % isoflurane gas with 100 %  
147 oxygen level, and placed on a heated pad to maintain its body temperature at 37 °C. The head  
148 was held in a stereotaxic frame (David Kopf Instruments, CA) with the snout placed into a nose  
149 cone to deliver the aforementioned level of surgical anesthesia.

150

### 151 **Surgical Procedures: Electrode Implantations and Application of the ES**

152 Two days post-TBI, animals were randomly assigned to the sham and ES groups (8, 7, and 9  
153 animals were chosen as the TBI control, sham, and ES group, respectively) (Figure 1a,b). For  
154 the sham group, an electrode was implanted without ES stimulation, whereas rats in the ES  
155 group received electrical stimulation through the implanted electrode.

156 We designed an implantable ES device, made of a 200  $\mu\text{m}$  diameter platinum microwire  
157 electrode (Omega Engineering, Cat# SPPL-008), 255  $\mu\text{m}$  Silicon/Copper hookup wire, and a  
158 polydimethylsiloxane (PDMS; Ellsworth Adhesives, Sylgard 184) block (Figure S2). The  
159 assembled ES devices were sterilized by immersion in 70 % ethanol within a UV light sterilizer  
160 chamber for one hour. A Germinator dry bead sterilizer was also used prior to the implantation.  
161 The animals for the sham and ES groups were prepared by placing them under surgical  
162 anesthesia as described above. The incision area was sanitized using ethanol and chlorhexidine,  
163 and the sutures were removed to release the skin flaps. An electrode was implanted in the injury  
164 epicenter to a depth of 2 mm in order to stimulate only the injured cerebral cortical region  
165 (Figure 1c,d). Three stainless steel screws were implanted in the skull to assist in affixing the  
166 device in place: the first at the position 1.5 mm anterior to the coronal suture, the second 2 mm  
167 lateral from the sagittal suture on the contralateral side, and the third (also used for connecting  
168 to electrical ground) 6 mm posterior to the electrode. The ES devices, including all screws,  
169 were covered with UV curing dental cement. For sham animals, the skin flaps were sutured,  
170 and the animal was allowed to recover as described above. In the ES group, after CCI and  
171 electrode implantation, the electrode and ground leads were connected to a function generator  
172 (Rigol, DG1022). ES was delivered as a rectangular, symmetric, biphasic, pulses (4 V peak-  
173 to-peak ( $V_{pp}$ ), 20 Hz frequency, 100 microseconds pulse duration) for one hour (Figure 1d). 4  
174  $V_{pp}$  was chosen as it was the maximal stimulation voltage that did not result in animals  
175 twitching during the stimulation. Note, the details of these conditions should be optimized for  
176 different animals or experimental conditions/models. Here, rectangular, symmetric, biphasic,  
177 pulsed ES was chosen to minimize persistent charge gradients, and deleterious electrodic  
178 effects (Merrill, Bikson, & Jefferys, 2005). After ES treatment, rats were also allowed to  
179 recover like sham animals.

180

### 181 **Neural Tissue Preparation and Immunohistochemistry**

182 Seven days post-injury, animals were sedated using 5 % isoflurane gas and transcardially  
183 perfused with 200 mL phosphate-buffered saline (PBS) (pH 7.4) followed by 100 mL 20 %  
184 sucrose in PBS. The brains were extracted and cut at the epicenter of the lesion using a rat brain  
185 matrix in the coronal plane (Ted Pella Inc., CA). Two half-sections submerged in optimal  
186 cutting temperature compound (Tissue Tek, Miles Inc., IN) were frozen in liquid nitrogen and  
187 stored at -80 °C. The frozen brains were sectioned at 12  $\mu\text{m}$  thickness using a cryostat  
188 (LeicaBiosystems, IL) and then collected onto glass slides: placing three 12  $\mu\text{m}$  sections from  
189 the rostral side of the injury and three from the caudal side in each slide, and collecting ten

190 slides per animal. Tissues were fixed with 100 % ethanol for 1 minute and then washed with  
191 PBS for 5 minutes, three times. Slides were kept in -20 °C before immunohistochemical  
192 staining and taken out before the staining to reach room temperature.

193 Immunohistochemistry was performed following previously described methods and  
194 controls matching previously published and appropriate patterns of stained cellular  
195 morphology and distribution (Betancur et al., 2017). Slides were washed in PBS (5 minutes,  
196 three times), and permeabilized with 0.05% Triton X-100 in PBS (1 minute), repeated three  
197 times. Slides were blocked with a blocking solution (0.5 % Triton X-100 in PBS and 4 % goat  
198 serum) for one hour. Primary antibodies diluted in blocking solution were added and slides  
199 were kept overnight at 4 °C. Primary antibodies used for this study were rabbit anti-NeuN  
200 (1:400, Millipore Sigma, Cat# MABN140, RRID:AB\_2571567), mouse anti-Nestin (1:500,  
201 Novus Biologicals, Cat# MAB2736, RRID:AB\_2282664), rabbit anti-Glial fibrillary acidic  
202 protein (GFAP; 1:1000, Dako, Cat# Z033429, RRID:AB\_10013382), mouse anti-CD68 (ED1;  
203 1:400, BioRad, Cat# MCA341R, RRID:AB\_2291300), and rabbit anti-Mannose receptor  
204 (CD206; 1:500, Abcam, Cat# ab64693, RRID\_AB1523910). Secondary antibodies diluted in  
205 PBS were added to samples for one hour at room temperature: Alexa Fluor 488-conjugated  
206 goat anti-rabbit IgG (1:400, Abcam, Cat# ab150081, RRID:AB\_2734747), and Alexa Fluor  
207 594-conjugated goat anti-mouse IgG (1:220, Abcam, Cat# ab150116, RRID:AB\_2650601).  
208 The prepared slides were then immersed in DAPI (1 µg/mL, Sigma Aldrich, Cat# D9542)  
209 solution for 20 minutes. Between each staining step, samples were washed thoroughly three  
210 times with permeabilization solution and PBS sequentially for 1 min and 5 mins, respectively.  
211 Slides were covered with coverslips supplemented with Fluoromount-G (Southern Biotech,  
212 AL).

213

## 214 **Microscopy**

215 Axio Observer 7 (Carl Zeiss, Germany) equipped with an Axiocam 702 mono camera or  
216 equipped with an Axiocam 305 color camera was used for imaging immunohistochemical  
217 tissues or Nissl-stained tissues, respectively. Confocal z-stack images were taken with LSM  
218 880 (Carl Zeiss, Germany).

219

## 220 **Image Quantification**

221 Quantitative analysis of images was done by tools in ImageJ (FIJI, RRID:SCR\_002285). For  
222 analysis, two brain sections were used, one within 1 mm rostral and one within 1 mm caudal  
223 to the lesion epicenter. In particular, before analyzing the intensity profiles, area, and degree

224 of colocalization for specific fluorophore<sup>+</sup> pixels, image intensity processing was performed.  
225 For the intensity profile analysis, images were processed with the Subtract Background tool to  
226 fix an uneven background then measured for intensity along the ROI line using the Plot Profile  
227 tool with a line width of 300 pixels. For fluorophore<sup>+</sup> area and colocalization analysis,  
228 background correction for images was performed using the Subtract Background tool, and then  
229 thresholding used to make fluorophore<sup>+</sup> pixels white and all other pixels black. Total  
230 fluorophore<sup>+</sup> area was measured using the Analyze Particles tool. In this study, Colocalization  
231 Threshold tool was used to obtain two Mander's split coefficients (M1 and M2: the  
232 colocalization coefficient relative to channel 1 and channel 2), and % of colocalized pixels  
233 (%Ch1 Vol and %Ch2 Vol: the percentage of the total number of colocalized pixels for each  
234 channel above their respective thresholds) (Zinchuk, Zinchuk, & Okada, 2007). The  
235 colocalized area was calculated by multiplying the channel<sub>1</sub><sup>+</sup> area and %Ch1 Vol (the same  
236 value as channel<sub>2</sub><sup>+</sup> area multiplied by the %Ch2 Vol). Because we measured the split  
237 coefficients using threshold-adjusted images, we minimized in quantification error due to  
238 background noise.

239

## 240 **Flow Cytometry**

241 Flow cytometry was performed to analyze the phenotypes of immune cells in the ipsilateral  
242 brain following a modified version of a previously published protocol (Posel, Moller, Boltze,  
243 Wagner, & Weise, 2016). The brain was extracted and placed into a stainless-steel coronal rat  
244 brain matrix (Zivic Instruments, Cat# BSRAS001-1), making coronal cuts to obtain 5 mm thick  
245 slices (brain slices at 1 - 6 mm posterior to bregma). The 5 mm thick brain slices were  
246 transferred into a plastic petri dish, placing the coronal plane on the dish surface, and the brain  
247 slices that contained the injured tissue of ipsilateral-cortex and hippocampus were dissected (5  
248 × 5 mm<sup>2</sup>). The dissected tissue samples were then dissociated into single-cell suspension. Cells  
249 were suspended in flow cytometry staining buffer (BD Biosciences) and treated with Fc-  
250 receptor blocker (2.5 μg/mL, anti-mouse CD16/32; BioLegend, Cat# 101301, RRID:  
251 AB\_312800) for 20 minutes at 4 °C in the dark. For the cell surface staining, fluorophore-  
252 conjugated primary antibodies, CD45-Pe/Cy7 (1 μg/mL, BD Biosciences, Cat# 561588,  
253 RRID:AB\_10893200) was used. CD206 (1 μg/mL, Abcam, Cat# ab64693,  
254 RRID:AB\_1523910) antibody was used with 488-conjugated secondary antibody (1 μg/mL,  
255 Abcam, Cat# ab150081, RRID:AB\_2650601). Cells were stained by these antibodies for 30  
256 minutes at 4 °C in the dark. Following thorough washing, flow cytometry was performed with  
257 a Novocyte 2060 flow cytometer and analyzed using FlowJo software (TreeStar, Inc., OR,

258 RRID:SCR\_008520). The specificity of the signals of antibodies against specific antigens was  
259 determined by performing a control experiment using compensation beads (Invitrogen, Cat#  
260 01-1111-42).

261

## 262 **Graphing and Statistics**

263 Treatment groups were randomly assigned following TBI induction. For sectioning, 10 slides  
264 per rat were obtained, and slides were randomly assigned for immunohistochemistry. For  
265 flow cytometry, the experiments were performed at once. One of the ES samples was found  
266 to be an outlier (as analyzed by Dixon's Q-test; 4 of 6 stained values were found to be an  
267 outlier at >90% confidence for this replicate), thus this rat was excluded. Outlier analysis was  
268 not performed on immunohistochemistry data. A power analysis was not performed a priori.

269 Prior to the statistical analysis, a Shapiro-Wilk normality test was performed for all  
270 data sets, and a statistical analysis method was chosen accordingly from: Kruskal Wallis 1-  
271 way ANOVA with Dunn's post-hoc, ANOVA 2-way with Tukey's post-hoc, or Welch  
272 ANOVA with Dunnett's post-hoc. All graphs and statistical analyses were done with Prism 8  
273 (Graphpad Inc., RRID:SCR\_002798). The statistical methods used are reported for each  
274 result, in place. An  $\alpha$  of 0.05 was used to determine significance. All graphs are depicted  
275 using Tukey method box and whiskers unless otherwise specified. All data are reported as  
276 mean  $\pm$  standard deviation unless otherwise specified.

277

## 278 **RESULTS**

### 279 **ES treatment increased the number of CD206<sup>+</sup> cells in the perilesional cortex**

280 Neuroinflammation in TBI-associated pathological processes is known to have a substantial  
281 influence on TBI outcomes (McKee & Lukens, 2016; Simon et al., 2017). Especially during  
282 the acute phase of TBI, a large number of immune cells, including the resident microglia and  
283 infiltrated monocytes and macrophages, play critical roles in inflammatory responses in brain,  
284 where their functional phenotypes reflect disease progression (Simon et al., 2017).

285 To identify the functional states of monocytes, macrophages, and microglia following  
286 TBI, immunohistochemistry was performed to measure the expressions of CD68, a marker for  
287 monocyte/macrophage/microglia, and CD206, a marker for M2 phenotype (Figure 2). Three  
288 experimental groups were tested, namely TBI (untreated control group), sham (TBI with an  
289 implanted electrode without ES), and ES (TBI with applied electrical stimulation through the  
290 implanted electrode) groups (Figure 1b). In a qualitative comparison, the distribution of CD68<sup>+</sup>  
291 cells were similar in all experimental groups. CD68<sup>+</sup> cells were found in the perilesional cortex,

292 including the core of the cortical lesion, and along the corpus callosum, but rarely in the  
293 hippocampus (Figure 2b). On the other hand, CD206<sup>+</sup> cells, representing M2 phenotype cells,  
294 were found only from the cortex to the hippocampus, in lower quantities than CD68<sup>+</sup> cells  
295 (Figure 2c). In addition, CD206<sup>+</sup> cells exhibited a distinct spatial distribution at the perilesional  
296 cortex upon ES treatment. In both untreated TBI and sham groups, CD206<sup>+</sup> cells only appeared  
297 near the cortical surface of the injury whereas those in the ES group were observed in areas  
298 deeper into the cortex.

299 For quantitative analysis, we analyzed the density of three subtypes of immune cells,  
300 namely CD68<sup>+</sup>, CD68<sup>+</sup>CD206<sup>+</sup>, and CD68<sup>-</sup>CD206<sup>+</sup> across the entire perilesional cortex (Figure  
301 2d and Table 2). The data indicated no change in the number of CD68<sup>+</sup> cells with ES treatment  
302 ( $p = 0.7386$ , *Kruskal-Wallis statistic* = 0.6059,  $df=2$ ) (Figure 2e), whereas the number of total  
303 CD206<sup>+</sup> cells (CD68<sup>+</sup>CD206<sup>+</sup> and CD68<sup>-</sup>CD206<sup>+</sup> cells) significantly increased by  
304 approximately 2.3 folds with ES compared to untreated TBI and sham operations ( $p < 0.0001$ ,  
305 *Kruskal-Wallis statistic* = 42.67,  $df = 2$ ) (Figure 2f). However, the overall number of CD206<sup>+</sup>  
306 cells were fewer than that of CD68<sup>+</sup> cells. The ES-induced increase in CD206 expression was  
307 confirmed among CD68<sup>+</sup>CD206<sup>+</sup> (Figure 2g) and CD68<sup>-</sup>CD206<sup>+</sup> (Figure 2h) groups, having  
308 more than 2 folds higher number in ES compared to untreated TBI and sham groups ( $p < 0.0001$ ,  
309 *Kruskal-Wallis statistic* = 40.53,  $df = 2$  for CD68<sup>+</sup>CD206<sup>+</sup>;  $p < 0.0001$ , *Kruskal-Wallis statistic*  
310 = 35.17,  $df = 2$  for CD68<sup>-</sup>CD206<sup>+</sup>).

311

### 312 **Distribution of CD206<sup>+</sup> cells shifted deeper into the perilesional cortex after ES treatment**

313 To analyze the differential spatial distribution of three subtypes of immune cells, the  
314 injured cortex was divided into two regions, ROI<sub>1</sub> and ROI<sub>2</sub>, the regions of 0-1 mm and 1-2  
315 mm from the cortical surface, respectively (Figure 3a,b, and Table 3). The number of CD68<sup>+</sup>  
316 cells in the two ROIs were not significantly different in all groups (two-way ANOVA;  
317 interaction,  $F_{(2, 129)} = 2.263$ ,  $p = 0.1082$ ; region,  $F_{(1, 129)} = 0.3986$ ,  $p = 0.5289$ ; treatment,  $F_{(2, 129)}$   
318 = 0.5577,  $p = 0.5739$ ) (Figure 3c), whereas CD206<sup>+</sup> subtype cells were both region- and  
319 treatment-dependent (two-way ANOVA; for CD206<sup>+</sup> cells, interaction,  $F_{(2, 129)} = 0.9397$ ,  $p =$   
320 0.3934; region,  $F_{(1, 129)} = 22.09$ ,  $p < 0.0001$ ; treatment,  $F_{(2, 129)} = 20.81$ ,  $p < 0.0001$ ; for  
321 CD68<sup>+</sup>CD206<sup>+</sup> cells, interaction,  $F_{(2, 129)} = 1.946$ ,  $p = 0.1471$ ; region,  $F_{(1, 129)} = 14.39$ ,  $p =$   
322 0.0002; treatment,  $F_{(2, 129)} = 13.04$ ,  $p < 0.0001$ ; for CD68<sup>-</sup>CD206<sup>+</sup> cells, interaction,  $F_{(2, 129)} =$   
323 0.3842,  $p = 0.6818$ ; region,  $F_{(1, 129)} = 17.26$ ,  $p < 0.0001$ ; treatment,  $F_{(2, 129)} = 19.02$ ,  $p < 0.0001$ )  
324 (Figure 3d-f). In untreated TBI and sham groups, CD206<sup>+</sup> cells were predominantly observed  
325 within ROI<sub>1</sub> and this level within ROI<sub>2</sub> was significantly decreased by more than 2.5 folds



326 (Figure 3d). While the number of CD206<sup>+</sup> cells within ROI<sub>1</sub> for the ES group was similar to  
327 that in the TBI and sham groups, interestingly, within ROI<sub>2</sub>, ES treatment remarkably increased  
328 the number of CD206<sup>+</sup> cells, which corresponded to the amount found in ROI<sub>1</sub> and was  
329 statistically significant compared to other groups. CD68<sup>+</sup>CD206<sup>+</sup> cells exhibited similar  
330 tendency to CD206<sup>+</sup> cells (Figure 3e). There were fewer CD68<sup>-</sup>CD206<sup>+</sup> cells than  
331 CD68<sup>+</sup>CD206<sup>+</sup> cells in both ROIs for all experimental groups, however, a significant increase  
332 in CD68<sup>-</sup>CD206<sup>+</sup> cells due to ES was observed in both ROI<sub>1</sub> and ROI<sub>2</sub> (Figure 3f).

333 We then evaluated the proportion of CD68<sup>+</sup>CD206<sup>+</sup> cells relative to CD68<sup>+</sup> and CD206<sup>+</sup>  
334 cells in ROI<sub>1</sub> and ROI<sub>2</sub> (Figure 3g and Table 4). Within ROI<sub>1</sub>, the proportions of CD68<sup>+</sup>CD206<sup>+</sup>  
335 cells among CD68<sup>+</sup> cells of all experimental groups was not statistically different, ranging from  
336 40 to 60 %, however, that proportion within ROI<sub>2</sub> was maintained in the ES group only (61.0  
337 ± 5.3 %) where TBI (11.0 ± 4.6 %) and sham (4.3 ± 0.8 %) groups significantly decreased  
338 compared to ROI<sub>2</sub> for ES (two-way ANOVA; interaction,  $F_{(2, 45)} = 4.137, p = 0.0224$ ; region,  
339  $F_{(1, 45)} = 12.62, p = 0.0009$ ; treatment,  $F_{(2, 45)} = 15.30, p < 0.0001$ ). On the other hand, the  
340 proportion of CD68<sup>+</sup>CD206<sup>+</sup> cells relative to CD206<sup>+</sup> cells was not significantly different  
341 regardless of region and treatment, ranging from 50 to 70 % (two-way ANOVA; interaction,  
342  $F_{(2, 45)} = 1.370, p = 0.2645$ ; region,  $F_{(1, 45)} = 1.174, p = 0.2844$ ; treatment,  $F_{(2, 45)} = 2.263, p =$   
343 0.1157).

344

### 345 **ES treatment increased abundance of CD206<sup>+</sup> microglial cells**

346 To specify the type of CD206<sup>+</sup> immune cells that responded to ES, we performed a  
347 flow cytometric analysis on cells obtained from bulk tissue of the entire perilesional cortex and  
348 hippocampus (Figure 4 and S3). CD45 antibody was used to differentiate resident microglia  
349 (CD45<sup>low</sup>) from blood-derived leukocytes (CD45<sup>high</sup>) (Febinger et al., 2015; Posel et al., 2016).  
350 The proportion of CD45<sup>low</sup> cells to CD45<sup>+</sup> cells increased significantly after ES (85.5 ± 4.4 %)  
351 compared to those in untreated TBI (67.2 ± 7.1 %;  $p = 0.0230$ ) and sham (66.9 ± 6.0 %;  $p =$   
352 0.0138;  $p = 0.9998$  for TBI vs. sham) groups (Welch ANOVA test with Dunnett post-hoc;  $W_{(2,$   
353  $5.300)} = 12.93, p = 0.0092$ ) (Figure 4a), whereas the proportion of CD45<sup>high</sup> cells decreased in  
354 the ES group (Welch ANOVA test with Dunnett post-hoc;  $W_{(2, 5.330)} = 10.53, p = 0.0141$ ) (TBI  
355 = 32.2 ± 7.5 %; sham = 32.7 ± 7.0; ES = 14.7 ± 4.5 %;  $p = 0.9993, p = 0.0323$ , and  $p = 0.0239$   
356 for TBI vs. sham, TBI vs. ES, and sham vs. ES) (Figure 4b). This may suggest ES induced  
357 recruitment of microglia while leukocytes are being suppressed in the perilesional cortex and  
358 hippocampus. When we measured CD206<sup>+</sup> cells within each CD45<sup>low</sup> or CD45<sup>high</sup>  
359 subpopulation, only CD45<sup>low</sup> cells showed treatment-dependent differences among phenotypic



360 subpopulations (Welch ANOVA test with Dunnett post-hoc; for Figure 4c,  $W_{(2, 4.620)} = 220.2$ ,  
361  $p < 0.0001$ ; for Figure 4d,  $W_{(2, 4.046)} = 5.365$ ,  $p = 0.0728$ ). First, in the untreated TBI group,  $43.6$   
362  $\pm 4.0$  % of CD45<sup>low</sup> cells expressed CD206, and the sham group showed a significantly  
363 increased CD206<sup>+</sup> cohort within CD45<sup>low</sup> cells ( $52.7 \pm 1.4$  %) compared to the untreated TBI  
364 group ( $p = 0.0016$ ) (Figure 4c). In the ES group,  $77.4 \pm 1.7$  % of CD45<sup>low</sup> cells were CD206<sup>+</sup>,  
365 displaying a statistical significance against the TBI ( $p < 0.0001$ ) and the sham group ( $p <$   
366  $0.0001$ ). Unlike CD45<sup>low</sup> microglia, our measurement of the CD206<sup>+</sup> subpopulation within  
367 CD45<sup>high</sup> leukocytes did not exhibit statistical differences among all three groups (TBI =  $53.3$   
368  $\pm 9.9$  %; sham =  $62.6 \pm 3.3$  %; ES =  $74.0 \pm 6.5$  %;  $p = 0.3364$ ,  $0.0533$ , and  $0.1532$  for TBI vs.  
369 sham, TBI vs. ES, and sham vs. ES) (Figure 4d). Lastly, based on the normalization of each  
370 population to CD45<sup>+</sup> cells, it was found that only ES treatment induced significant phenotypic  
371 polarization of the observed immune cells, predominantly marked by an increase in CD206<sup>+</sup>  
372 microglia (Welch ANOVA test with Dunnett post-hoc; for CD45<sup>low</sup>CD206<sup>+</sup>/CD45<sup>+</sup>,  $W_{(2, 4.785)}$   
373 =  $53.21$ ,  $p = 0.0005$ ; for CD45<sup>high</sup>CD206<sup>+</sup>/CD45<sup>+</sup>,  $W_{(2, 3.611)} = 4.814$ ,  $p = 0.0958$ )  
374 (CD45<sup>low</sup>CD206<sup>+</sup>/CD45<sup>+</sup> for TBI =  $29.5 \pm 5.6$  %, sham =  $35.2 \pm 3.6$  %, and ES =  $66.2 \pm 4.5$  %;  
375  $p = 0.1424$ ,  $p = 0.0007$ , and  $p = 0.0016$  for TBI vs. sham, TBI vs. ES, and sham vs. ES) (Figure  
376 4e).

377

### 378 **ES treatment increased the populations of Nestin<sup>+</sup> and Nestin<sup>+</sup>GFAP<sup>+</sup> cells in the** 379 **ipsilateral cortex**

380 To investigate the endogenous healing response in the perilesional cortex by ES after  
381 TBI, immunohistochemistry was performed on our collected tissues to measure the expression  
382 levels of Nestin and glial fibrillary acidic protein (GFAP), a general marker for NSCs and  
383 astrocytes, respectively (Figure 5a). Regarding regional distribution, GFAP<sup>+</sup> cells were  
384 observed throughout the entire cortex in all experimental groups. Few Nestin<sup>+</sup> cells were found  
385 overall, located primarily along the perilesional rims in the untreated TBI and sham groups. In  
386 contrast, in the ES group, Nestin<sup>+</sup> cells were spread liberally from the perilesional rims to the  
387 distant cerebral cortex. Moreover, some fraction of Nestin<sup>+</sup> cells co-expressed GFAP. Using  
388 confocal z-stack colocalization analysis in coronal planes, we confirmed that the majority of  
389 the Nestin<sup>+</sup> voxels were colocalized with GFAP in all experimental groups (Figure 5b). In the  
390 TBI and sham groups, in particular, not all GFAP<sup>+</sup> voxels were positive for Nestin, but in the  
391 ES group, GFAP<sup>+</sup> voxels mostly coincided with Nestin expression.

392 Next, the spatial distribution of Nestin (Figure 5c) and GFAP (Figure 5d) intensity  
393 profiles from the perilesional rim further into the cortex was identified. First, in both the

394 untreated TBI and sham groups, Nestin was predominantly expressed in the perilesional rims,  
395 but not in areas distant from perilesional rim, whereas in the ES group, a substantial increase  
396 in Nestin intensity in the perilesional cortex was observed with a gradual decrease away from  
397 the injury site (Figure 5c). We also confirmed that the GFAP intensity was at its maximum  
398 level near the perilesional rim and decreased exponentially (Figure 5d). The mean Nestin or  
399 GFAP intensity profiles were best fit to the one-phase exponential decay curve (Figure S4 and  
400 Figure 5c,d). From the fitting curves of Nestin and GFAP intensity profiles, two values were  
401 obtained: rate constant ( $k$ ) that measures the rate of intensity-decrease over a distance, and  
402 half-life ( $\ln(2)/k$ ) that represents a distance required for intensity to reduce to half of its initial  
403 value (Figure S4c). In Nestin fitting curve, the fitted values of rate constant (TBI =  $0.0035/\mu\text{m}$ ,  
404 sham =  $0.0049/\mu\text{m}$ , ES =  $0.0024/\mu\text{m}$ ) and half-life (TBI =  $196.8 \mu\text{m}$ , sham =  $141.7 \mu\text{m}$ , ES =  
405  $289.9 \mu\text{m}$ ) demonstrated that Nestin intensity rapidly decreased in sham, TBI, and ES,  
406 sequentially. In the curve fit for GFAP, as compared to the Nestin-fitting results, the rate  
407 constants of GFAP in all experimental groups (TBI =  $0.0020/\mu\text{m}$ , sham =  $0.0029/\mu\text{m}$ , ES =  
408  $0.0022/\mu\text{m}$ ) were observed to be reduced and the half-life of the GFAP-fitting curve (TBI =  
409  $342.1 \mu\text{m}$ , sham =  $237.9 \mu\text{m}$ , ES =  $318.3 \mu\text{m}$ ) increased, indicating that GFAP intensity  
410 persisted further than Nestin intensity. In addition, to determine whether the injury and/or  
411 treatment induced an astrocytic activation, GFAP expression in the ipsilateral cortex compared  
412 to that of the contralateral side was analyzed (Figure 5e). The relative expression of GFAP in  
413 the ipsilateral cortex appeared to increase on average, but there were no significant differences  
414 between all three groups ( $p = 0.0503$ , *Kruskal-Wallis statistic* = 5.981,  $df = 2$ ; TBI =  $2.81 \pm$   
415  $1.02$ ; sham =  $2.00 \pm 1.99$ ; ES =  $4.45 \pm 4.03$ ;  $p = 0.1862$ ,  $p > 0.9999$ , and  $p = 0.0516$  for TBI  
416 vs. sham, TBI vs. ES, and sham vs. ES).

417 Furthermore, within 0-2 mm from the perilesional rims, we used Mander's split  
418 coefficients (Zinchuk et al., 2007) to analyze the degree of GFAP and Nestin colocalization,  
419 which corresponds to the proportion of colocalized signal relative to overall fluorophore<sup>+</sup> pixels  
420 (Figure 5f). The colocalization coefficient relative to Nestin<sup>+</sup> pixels appeared not significantly  
421 different in all treatment conditions (Welch ANOVA test with Dunnett post-hoc;  $W_{(2, 11.70)} =$   
422  $3.716$ ,  $p = 0.0563$ ; TBI =  $0.619 \pm 0.225$ , sham =  $0.848 \pm 0.082$ , ES =  $0.777 \pm 0.083$ ;  $p = 0.0721$ ,  
423  $p = 0.2361$ , and  $p = 0.3075$  for TBI vs. sham, TBI vs. ES, and sham vs. ES), whereas the  
424 colocalization coefficient relative to GFAP<sup>+</sup> pixels increased significantly in the ES group  
425 (Welch ANOVA test with Dunnett post-hoc;  $W_{(2, 11.97)} = 15.55$ ,  $p = 0.0005$ ; TBI =  $0.148 \pm$   
426  $0.133$ , sham =  $0.149 \pm 0.112$ , ES =  $0.410 \pm 0.100$ ;  $p > 0.9999$ ,  $p = 0.0014$ , and  $p = 0.0025$  for  
427 TBI vs. sham, TBI vs. ES, and sham vs. ES).

428           Next, we measured the (projected) areas where Nestin or GFAP signals are observed  
429 within the same cortical ROI used for the above colocalization analysis (Figure 5g). Based on  
430 the detected Nestin fluorescent signal, the significantly increased population of Nestin<sup>+</sup> cells  
431 in the ES group was confirmed ( $498,738 \pm 263,474 \mu\text{m}^2$ ), when compared to those of the  
432 untreated TBI ( $64,462 \pm 62,754 \mu\text{m}^2$ ;  $p = 0.0015$ ) and sham rats ( $53,664 \pm 39,387 \mu\text{m}^2$ ;  $p =$   
433  $0.0011$ ) (TBI vs. sham:  $p = 0.9700$ ) (Welch ANOVA test with Dunnett post-hoc;  $W_{(2, 13.69)} =$   
434  $13.13$ ,  $p = 0.0007$ ). Comparatively, the GFAP<sup>+</sup> area was larger than the Nestin<sup>+</sup> area, displaying  
435 no statistical significance between groups (Welch ANOVA test with Dunnett post-hoc;  $W_{(2,$   
436  $10.58)} = 0.7981$ ,  $p = 0.4755$ ; TBI =  $820,341 \pm 476,882 \mu\text{m}^2$ , sham =  $902,247 \pm 637,979 \mu\text{m}^2$ , ES  
437 =  $1,071,960 \pm 342,906 \mu\text{m}^2$ ;  $p = 0.9904$ ,  $p = 0.5289$ , and  $p = 0.9043$  for TBI vs. sham, TBI vs.  
438 ES, and sham vs. ES). Furthermore, compared to untreated TBI and sham groups, a significant  
439 increase in the regions with both Nestin and GFAP signals was confirmed in the ES group  
440 (Welch ANOVA test with Dunnett post-hoc;  $W_{(2, 13.27)} = 15.23$ ,  $p = 0.0004$ ; TBI =  $44,166 \pm$   
441  $38,756 \mu\text{m}^2$ , sham =  $49,662 \pm 38,907 \mu\text{m}^2$ , ES =  $330,314 \pm 155,412 \mu\text{m}^2$ ;  $p = 0.9907$ ,  $p =$   
442  $0.0007$ , and  $p = 0.0006$  for TBI vs. sham, TBI vs. ES, and sham vs. ES). Next, the areas of  
443 Nestin<sup>+</sup>GFAP<sup>-</sup> and Nestin<sup>-</sup>GFAP<sup>+</sup> regions were calculated by subtracting Nestin<sup>+</sup>GFAP<sup>+</sup> area  
444 from Nestin<sup>+</sup> and GFAP<sup>+</sup> area, respectively (Figure 5h). While the Nestin<sup>+</sup>GFAP<sup>-</sup> area in the  
445 ES group was significantly larger than that of untreated TBI and sham groups (Welch ANOVA  
446 test with Dunnett post-hoc;  $W_{(2, 11.86)} = 8.354$ ,  $p = 0.0054$ ; TBI =  $28,935 \pm 28,389 \mu\text{m}^2$ , sham =  
447  $14,348 \pm 8,799 \mu\text{m}^2$ , ES =  $168,424 \pm 120,881 \mu\text{m}^2$ ;  $p = 0.4702$ ,  $p = 0.0156$ , and  $p = 0.0087$  for  
448 TBI vs. sham, TBI vs. ES, and sham vs. ES), whereas there were no significant differences in  
449 Nestin<sup>-</sup>GFAP<sup>+</sup> area across the groups (Welch ANOVA test with Dunnett post-hoc;  $W_{(2, 9.943)} =$   
450  $0.08872$ ,  $p = 0.9158$ ; TBI =  $776,176 \pm 477,085 \mu\text{m}^2$ , sham =  $852,585 \pm 613,177 \mu\text{m}^2$ , ES =  
451  $741,646 \pm 276,558 \mu\text{m}^2$ ;  $p = 0.9915$ ,  $p = 0.9968$ , and  $p = 0.9633$  for TBI vs. sham, TBI vs. ES,  
452 and sham vs. ES).

453

#### 454 **Hippocampal Nestin<sup>+</sup> cells exhibited distinct morphologies from those in the ipsilateral** 455 **cortex**

456           Next, we analyzed Nestin and GFAP expression in the hippocampal region (Figure 6).  
457 An increased number of Nestin<sup>+</sup> cells in the ES group was observed also in the hippocampal  
458 region. However, unlike Nestin<sup>+</sup> cells in the ipsilateral cortex, the hippocampal Nestin<sup>+</sup> cells  
459 were not predominantly colocalized with GFAP proteins. Here, three marked characteristics of  
460 hippocampal Nestin<sup>+</sup> cells were identified based on the GFAP expression and cellular  
461 morphology. Many Nestin<sup>+</sup>GFAP<sup>-</sup> cells displayed vessel-like morphology that featured plump

462 cell bodies, showing 2-3 cells aligned as if they were adjoined to one another (Figure 6b). In  
463 addition, long and slender processes of GFAP<sup>+</sup> cells appeared to be in contact with the vessel-  
464 like Nestin<sup>+</sup>GFAP<sup>-</sup> cells, as if the end-feet of astrocytes were wrapping around the blood vessels.  
465 Such vessel-like Nestin<sup>+</sup>GFAP<sup>-</sup> cells were shown in all experimental groups. Nestin<sup>+</sup> cells that  
466 featured multiple processes were denoted as fibrous Nestin<sup>+</sup>GFAP<sup>-</sup> cells (Figure 6c) or fibrous  
467 Nestin<sup>+</sup>GFAP<sup>+</sup> cells (Figure 6d).

468 We quantified the number of Nestin<sup>+</sup> cells per field in the dentate gyrus granule cell  
469 layer, and found that the ES treated group had a high number of Nestin<sup>+</sup> cells in the ipsilateral  
470 hippocampal region ( $p = 0.0016$ , *Kruskal-Wallis statistic* = 9.737,  $df = 2$ ), displaying a  
471 statistical significance against sham but not against TBI (TBI =  $224.0 \pm 133.4$  cells/mm<sup>2</sup>, sham  
472 =  $180.0 \pm 222.2$  cells/mm<sup>2</sup>, ES =  $800.0 \pm 417.9$  cells/mm<sup>2</sup>;  $p > 0.9999$ ,  $p = 0.0789$ ,  $p = 0.0118$  for  
473 TBI vs. sham, TBI vs. ES, sham vs. ES) (Figure 6e). Then, the relative ratios of the three  
474 structural sub-phenotypes were quantified (two-way ANOVA with Tukey's post-hoc;  
475 interaction,  $F_{(4, 45)} = 1.980$ ,  $p = 0.1138$ ; sub-phenotypes,  $F_{(2, 45)} = 28.87$ ,  $p < 0.0001$ ; treatment,  
476  $F_{(2, 45)} = 6.01e-009$ ,  $p > 0.9999$ ) (Figure 6f). All experimental groups showed a significantly  
477 higher proportion of Nestin<sup>+</sup>GFAP<sup>-</sup> vessel-like structural cells among all Nestin<sup>+</sup> cells (TBI =  
478  $67.6 \pm 31.8$  %, sham =  $90.4 \pm 11.2$  %, and ES =  $57.2 \pm 35.4$  %). Relatively, the proportion of  
479 fibrous Nestin<sup>+</sup>GFAP<sup>-</sup> cells among all Nestin<sup>+</sup> cells (TBI =  $13.0 \pm 18.6$  %, sham =  $6.9 \pm 8.3$  %, and  
480 ES =  $16.4 \pm 21.3$  %) and fibrous Nestin<sup>+</sup>GFAP<sup>+</sup> cells (TBI =  $19.4 \pm 31.4$  %, sham =  $2.7 \pm$   
481  $5.4$  %, and ES =  $26.5 \pm 22.5$  %) significantly decreased (TBI:  $p = 0.0032$ ,  $p = 0.0101$ , and  $p =$   
482  $0.9115$ ; sham:  $p < 0.0001$ ,  $p < 0.0001$ , and  $p = 0.9694$ ; ES:  $p = 0.0031$ ,  $p = 0.0313$ , and  $p =$   
483  $0.6652$ ;  $p$ -values in each group represent vessel-like cells vs. fibrous Nestin<sup>+</sup>GFAP<sup>-</sup> cells,  
484 vessel-like cells vs. fibrous Nestin<sup>+</sup>GFAP<sup>+</sup> cells, and fibrous Nestin<sup>+</sup>GFAP<sup>-</sup> cells vs. fibrous  
485 Nestin<sup>+</sup>GFAP<sup>+</sup> cells, respectively).

486

#### 487 **Neuronal viability in the perilesional cortex increased in groups with an implanted** 488 **electrode (sham & ES) following TBI**

489 To assess the effect of ES on the primary trauma to neural tissues after TBI, the presence  
490 of NeuN, a marker for mature neurons, was analyzed by immunohistochemistry (Figure 7a).  
491 Cells in the core of the cortical lesion exhibited very low NeuN immunoreactivity, indicative  
492 of an increase in injured neurons. To quantify the progress of neuronal loss near the perilesional  
493 cortex, the number of NeuN<sup>+</sup> cells within 250  $\mu$ m from the injury in ROI containing at least  
494 100 nuclei was measured (Figure 7b). In all experimental groups, the number of NeuN<sup>+</sup> cells  
495 decreased in the perilesional cortex compared to its uninjured contralateral side, implying that

496 TBI gave rise to neuronal loss, but the level of discrepancy was treatment dependent ( $p =$   
497  $0.0064$ , *Kruskal-Wallis statistic* =  $9.024$ ,  $df = 2$ ). In untreated TBI group,  $54.3 \pm 13.9$  % of  
498 NeuN<sup>+</sup> cells relative to the contralateral side was observed. In the perilesional cortex of sham  
499 and ES, significantly increased NeuN<sup>+</sup> expression was confirmed compared to the untreated  
500 TBI group (sham =  $75.5 \pm 9.8$  %, ES =  $77.7 \pm 20.5$  %;  $p = 0.0461$  for TBI vs. sham,  $p = 0.0211$   
501 for TBI vs. ES), but there were no significant differences between the sham and ES groups ( $p$   
502  $> 0.0999$ ). We also quantified the progress of neuronal loss in the CA3 region close to the  
503 dentate gyrus of hippocampus where NSCs are believed to initiate endogenous regeneration  
504 following the injury. In all experimental groups, the NeuN<sup>+</sup> cell population in the ipsilateral  
505 CA3 was lower than that in the contralateral side, of which the relative fractions were  $81.9 \pm$   
506  $39.3$  % of for TBI,  $88.1 \pm 25.7$  % for sham, and  $92.8 \pm 18.4$  % for ES with no statistical  
507 significance among all groups (Welch ANOVA test with Dunnett post-hoc;  $W_{(2, 13.99)} = 0.3721$ ,  
508  $p = 0.6959$ ).

509

## 510 **DISCUSSION**

511       Neuronal damage and death are the most critical pathological consequences in TBI,  
512 incurring long-lasting and functional impairment in the brain. For the improved recovery of  
513 brain function, neuronal death should be minimized as well as secondary, deleterious effects  
514 by shifting the injury-associated cellular and inflammatory milieu. In this study, we showed  
515 the potential use of an invasive ES as a means to therapeutically improve this milieu following  
516 TBI. In this study, an increase in CD206<sup>+</sup> cells was observed after ES in the perilesional cortex,  
517 and the distribution of these cells shifted deeper into the cortex than in control and sham  
518 animals. ES was also observed to increase the relative abundance of CD206<sup>+</sup> microglial cells,  
519 and the populations of Nestin<sup>+</sup> and Nestin<sup>+</sup>GFAP<sup>+</sup> cells in the injury-ipsilateral cortex. The  
520 Nestin<sup>+</sup> cells in the hippocampus also exhibited distinct morphologies from those in the  
521 ipsilateral cortex after ES. Lastly, after TBI, neuronal viability in the perilesional cortex was  
522 observed to increase in animals with an implanted electrode regardless of ES condition. Please  
523 note, conclusions in this study are limited to male rats as sex differences were not studied.

524       We chose to use invasive electrodes to localize the effects of the ES to the injury site.  
525 To minimize any side effects during electric stimulation, a balanced-biphasic stimulation mode  
526 was used such that accumulation of charges and toxic byproducts would be minimized around  
527 the electrode (Merrill et al., 2005). We also considered the timing of ES treatment.  
528 Immunomodulation in the early stages of brain damage has emerged as one of the important  
529 therapeutic targets because phenotypic alterations during acute neuroinflammation (Kumar et



530 al., 2016; Wang et al., 2013) can critically attribute to chronic pathologies, including the  
531 induction of neuronal death or attenuation of the neurogenesis (Loane, Kumar, Stoica, Cabatbat,  
532 & Faden, 2014; Schimmel, Acosta, & Lozano, 2017). The positive impact of appropriate timing  
533 of immunomodulation, especially early in the regeneration process, has been shown in multiple  
534 peripheral nerve studies (Mokarram et al., 2017; Mukhatyar et al., 2014; Ydens et al., 2012).  
535 Additionally, NSCs have been shown to be involved in the early healing process by being  
536 activated within three days following TBI (Itoh et al., 2005; Yi et al., 2013). Based on these  
537 observations, we decided to apply the ES on the 2nd day post-TBI to modulate the phenotypes  
538 of both immune cells and NSCs.

539       Regarding neuroinflammation, we first assessed the M2 phenotype population by  
540 counting cells that expressed CD68 and/or CD206, which revealed differential spatial  
541 distribution of phenotypic markers that depended on cortical depth relative to injury lesion  
542 (Figure 2 and Figure 3). Following TBI, CD68<sup>+</sup> cells were shown to be distributed throughout  
543 the entire perilesional cortex and corpus callosum excluding the hippocampus, whereas  
544 CD206<sup>+</sup> cells were mostly observed near the cortical surface. Perego, et al., showed differential  
545 spatial patterns of immune cell markers and M2 phenotype markers in ischemic stroke, similar  
546 to our results (Perego, Fumagalli, & De Simoni, 2011). Moreover, they observed phagocytosed  
547 neurons by CD11b/CD68 double positive immune cells in the region where the M2 phenotype  
548 cells were not found. Considering that CD68 is not only an immune cell marker but also used  
549 as a phagocytic cell marker, these collective data suggest that innate healing processes might  
550 be limited to the cortical surface under natural circumstances after brain damage. In our study,  
551 we found that ES treatment could increase CD206 expression regardless of CD68 expression  
552 in the region of 1-2 mm from the cortical surface to levels as high as was found in the region  
553 of 0-1 mm from there (Figure 3d-f)—and without a change in the density and spatial distribution  
554 of CD68<sup>+</sup> cells, whereas in the sham operation this was not observed (Figure 3c).

555       However, in our flow cytometric analysis of CD45<sup>+</sup> cells (leukocytes and microglia)  
556 from the entire perilesional cortex and hippocampus, the presence of an implanted electrode  
557 was sufficient to increase the proportion of CD206<sup>+</sup> microglia relative to untreated TBI group  
558 (Figure 4), though this was not corroborated using CD68 immunohistochemistry (Figure 2,3).  
559 Even so, the level of CD206 expression in microglia grew markedly with ES compared to  
560 untreated TBI and sham groups (Figure 4c), whereas leukocytes did not respond with an M2-  
561 like phenotypic shift even after electrical stimuli (Figure 4d). Based on these results, we  
562 summarized the phenotypic marker expression (Figure 8a-c). We found that the sham operation  
563 slightly increased CD68<sup>+</sup>CD206<sup>+</sup> cells in the region of 0-1 mm from the cortical surface

564 compared to untreated TBI on average, though there was no significance (Table 3 and Figure  
565 3e). We assume that this slight change was due to microglial response, which was discriminable  
566 using flow cytometry (Figure 8b). A remarkable increase of CD206 expression in the CD68<sup>+</sup>  
567 (Figure 3e) and CD68<sup>-</sup> (Figure 3f) populations after ES was shown in Figure 8c, which is  
568 thought to be driven by phenotypic alterations in CD45<sup>low</sup> microglia as identified with flow  
569 cytometry (Figure 4c).

570 The differential response of microglia and leukocytes to ES has yet to be thoroughly  
571 explored. Nevertheless, the role of infiltrating leukocytes seems less critical, given that they  
572 exist in the brain only temporarily, while microglia are brain-resident immune cells that  
573 continually participate throughout all pathological processes in TBI (Donat, Scott, Gentleman,  
574 & Sastre, 2017). Therefore, microglia that could have some therapeutic responsiveness to an  
575 exogenous electrical stimulus are thought to be a promising cellular target for  
576 immunomodulation by ES across both acute and chronic stages of TBI.

577 We also observed a noticeable increase of cortical Nestin expression after ES (Figure  
578 5). Nestin is known as a marker for NSCs, which are considered to be key players in promoting  
579 the regeneration and restoration of the injury site in TBI (Bond et al., 2015). In adult rat TBI,  
580 several studies have shown temporal patterns of cortical Nestin expression where Nestin<sup>+</sup> cells  
581 migrate from the neurogenic niche following injury onset to the perilesional cortex, peaking at  
582 three days post-TBI and then decreasing (Itoh et al., 2005; Yi et al., 2013). Thus, diminished  
583 neural stem cell trafficking in the adult brain is believed to contribute to delayed or incomplete  
584 healing. In our analyses of the tissues taken 7d post-TBI, Nestin<sup>+</sup> cells were rarely observed in  
585 untreated TBI and sham rats, whereas a large number of Nestin<sup>+</sup> cells appeared in the  
586 perilesional cortex after ES (Figure 5g left), supporting the notion that ES treatment promoted  
587 the maintenance and/or the recruitment of the Nestin<sup>+</sup> cells from the neurogenic niche.

588 Interestingly, we confirmed the ES-induced increase in the number of Nestin<sup>+</sup>GFAP<sup>+</sup>  
589 cells in the perilesional cortex (Figure 5g right). We suggest two possibilities for how  
590 Nestin<sup>+</sup>GFAP<sup>+</sup> cells may have been increased by ES. First, Nestin<sup>+</sup>GFAP<sup>+</sup> cells in our study  
591 might have resulted from differentiated Nestin<sup>+</sup> cells after the brain injury, co-expressing two  
592 markers at the same time. However, based on no significance in Mander's split coefficient  
593 relative to Nestin amongst three groups (Figure 5f), we concluded that ES treatment was not  
594 likely involved in the process of expressing GFAP in Nestin<sup>+</sup> cells. The other possibility is  
595 GFAP<sup>+</sup> cells expressing Nestin. Several studies have shown that GFAP<sup>+</sup> cortical astrocytes  
596 could express Nestin after brain injury, after acquiring multipotency (Gabel et al., 2016;  
597 Shimada, LeComte, Granger, Quinlan, & Spees, 2012). In the perilesional cortex of our



598 samples, the average GFAP-intensity values (Figure 5e) and GFAP<sup>+</sup> area (Figure 5g middle)  
599 were similar between all three groups, but the Mander's split coefficient relative to GFAP was  
600 noticeably increased by ES. These results indicated that ES treatment may have induced  
601 astrocytes to express Nestin while having no immediate impact on the level of GFAP  
602 expression. Taken these results together, we suggest that ES treatment facilitates the  
603 maintenance/recruitment of NSCs to the cortical injury and the acquisition of stemness in  
604 cortical astrocytes, simultaneously (Figure 8d,e).

605 ES treatment also increased hippocampal Nestin<sup>+</sup> cells (Figure 6). However, based on  
606 phenotypic differences, these Nestin<sup>+</sup> cells are thought to be different from those in the cortical  
607 region. Unlike in the cortical region, the majority of hippocampal Nestin<sup>+</sup> cells displayed  
608 vessel-like phenotypes: 2 or 3 thick cells aligned and adjoined together (Figure 6b). The rest  
609 of hippocampal Nestin<sup>+</sup> cells, with or without GFAP, showed multiple processes, displaying  
610 fibrous morphologies distinct from the vessel-like ones (Figure 6c,d). These cells are positively  
611 identified as either hippocampal NSCs or those derived from astrocytes, similar to the cortical  
612 Nestin<sup>+</sup> cells. The proportion of these morphologically distinct groups of Nestin<sup>+</sup> cells was  
613 similar in all experimental groups (Figure 6f), suggesting that ES treatment following TBI  
614 promoted overall Nestin<sup>+</sup> cells, with no specificity in any particular morphology of Nestin<sup>+</sup>  
615 cells. While the identity of vessel-like Nestin<sup>+</sup> cells remains unknown, some recent studies  
616 have provided some critical clues as to what they might be. Nakagomi, et al., demonstrated that  
617 brain vascular pericytes acquired stem cell-like properties following cortical ischemia  
618 (Nakagomi et al., 2015), and that those brain vascular pericytes exhibited similar  
619 morphological traits to our vessel-like Nestin<sup>+</sup> cells that occurred during the recovery following  
620 TBI. Based on the morphological similarities, one possibility could be that these vessel-like  
621 Nestin<sup>+</sup> cells were indeed hippocampal pericytes expressing Nestin. In addition, Nestin<sup>+</sup>  
622 pericytes have been previously observed to differentiate into microglia (Sakuma et al., 2016).  
623 Thus, our observed increase of vessel-like Nestin<sup>+</sup> cells by ES (Figure 6e,f) may have  
624 contributed to the observed increase in microglial population (Figure 4a), thereby decreasing  
625 the relative proportion of leukocytes (Figure 4b).

626 Overall, the increase in both cortical and hippocampal Nestin<sup>+</sup> cells by ES can be  
627 interpreted in connection with concurrently promoted anti-inflammatory microenvironments.  
628 Activated immune cells following brain damage are known to impact the proliferation, survival,  
629 migration, and differentiation of NSCs (Addington et al., 2015; Covacu & Brundin, 2017).  
630 Several studies have shown that an increase of M2 immune cells after brain injury has  
631 neurogenic effects on NSCs *in vivo* and *in vitro* (Choi et al., 2017; Vay et al., 2018).

632 Accordingly, we suggest the possibility that ES enhances the anti-inflammatory state of the  
633 lesion environment, leading to increased survival and proliferation of NSCs.

634 However, while ES treatment showed a significant suppression of cortical neuronal die-  
635 off (evidenced by sustained NeuN expression at the perilesional cortex as compared to  
636 untreated TBI group), this effect was also observed in the sham group (Figure 7b). These results  
637 suggest that the electrode implantation into the cortical lesion alone, regardless of ES, could  
638 improve the recovery of the brain function by increasing neuronal viability in the cortex after  
639 seven days post-TBI. We also observed more M2 microglia in the groups with an electrode  
640 implantation, which may imply a possible involvement of M2 microglia in the neuronal  
641 viability after TBI.

642 In conclusion, to the best of our knowledge, our study is the first to demonstrate the  
643 overall impact of ES during the acute phase of TBI recovery on the promoted pro-healing  
644 phenotypes of microglia, the increased population of NSCs and Nestin<sup>+</sup> astrocytes, and the  
645 enhanced viability of cortical neurons. Based on our findings, we propose a plausible scenario  
646 for intercellular communication among microglia, NSCs, astrocytes, and neurons (Figure 9).  
647 As illustrated in Figure 9a, after TBI, pro-healing immune cells and NSCs were confined near  
648 the edge of the cortical lesion, not being able to extend their protective influence over the entire  
649 perilesional region during the recovery process. When ES was applied, the effective region of  
650 occupancy by pro-healing immune cells (especially microglia) and Nestin<sup>+</sup> cells (derived from  
651 either NSCs or astrocytes) penetrated deeper into the distant perilesional cortex. We confirmed  
652 enhanced neuronal viability after TBI over the broader perilesional cortex, which is believed  
653 to be accompanied by changes in injury-associated cellular and inflammatory milieu. Figure  
654 9b illustrates the emergence of various types of Nestin<sup>+</sup> cells by ES that include Nestin<sup>+</sup>  
655 pericyte, Nestin<sup>+</sup> NSC, and Nestin<sup>+</sup>GFAP<sup>+</sup> NSC. However, neither the origin of the emergent  
656 NSCs nor the mechanism of functional alterations by ES is known, and it will be an intriguing  
657 research topic to further investigate these mysteries. Additionally, for effective therapeutic  
658 application of ES, optimization of ES parameters, including frequency, magnitude, duration of  
659 stimulation, and number of treatments, for overall neural tissue regeneration should be  
660 thoroughly explored. Nevertheless, our results strongly support the potential benefit of the  
661 therapeutic use of ES during the acute phase of TBI to regulate neuroinflammation and to  
662 enhance neuroregeneration for improved healing.

663

#### 664 **Conflict of Interest Statement**

665 The authors declare no competing interest.

666

667 **Author Contributions**

668 All the authors read and approved the final manuscript. *Conceptualization*, E.P., J.G.L., J.H.S.,  
669 and R.V.B.; *Data Curation*, E.P.; *Formal Analysis*, E.P., and J.G.L.; *Investigation*, E.P., M.A.-  
670 V., and M.I.B.; *Methodology*, E.P., J.G.L., M.A.-V., M.I.B., and N.M.; *Project Administration*,  
671 E.P., J.G.L., J.H.S., and R.V.B.; *Validation*, E.P., M.A.-V., and M.I.B.; *Writing – Original*  
672 *Draft*, E.P.; *Writing – Review & Editing*, E.P., J.G.L., N.M., J.H.S., and R.V.B.; *Funding*  
673 *Acquisition*, J.H.S. and R.V.B.; *Resources*, J.H.S., and R.V.B.; *Software*, E.P., and J.G.L.,  
674 *Supervision*, J.G.L., J.H.S., and R.V.B.

675

676 **Acknowledgments**

677 This paper is based on a research which has been conducted as part of the KAIST-funded  
678 Global Singularity Research Program for 2020. This work was supported by the National  
679 Institute of Neurological Disorders and Stroke (NINDS), of the National Institutes of Health  
680 (NIH), R01NS079739-05.

681

682 **Data Accessibility Statement**

683 All data needed to evaluate the conclusions in the paper are present in the paper and/or the  
684 Supporting Information. Additional data related to this paper may be requested from the  
685 authors.

## 686 REFERENCES

- 687 Addington, C. P., Roussas, A., Dutta, D., & Stabenfeldt, S. E. (2015). Endogenous repair  
688 signaling after brain injury and complementary bioengineering approaches to  
689 enhance neural regeneration. *Biomark Insights*, *10*(Suppl 1), 43-60.  
690 doi:10.4137/BMI.S20062
- 691 Betancur, M. I., Mason, H. D., Alvarado-Velez, M., Holmes, P. V., Bellamkonda, R. V., &  
692 Karumbaiah, L. (2017). Chondroitin Sulfate Glycosaminoglycan Matrices Promote  
693 Neural Stem Cell Maintenance and Neuroprotection Post-Traumatic Brain Injury. *ACS*  
694 *Biomater Sci Eng*, *3*(3), 420-430. doi:10.1021/acsbiomaterials.6b00805
- 695 Bond, A. M., Ming, G. L., & Song, H. (2015). Adult Mammalian Neural Stem Cells and  
696 Neurogenesis: Five Decades Later. *Cell Stem Cell*, *17*(4), 385-395.  
697 doi:10.1016/j.stem.2015.09.003
- 698 Chen, C., Bai, X., Ding, Y., & Lee, I. S. (2019). Electrical stimulation as a novel tool for  
699 regulating cell behavior in tissue engineering. *Biomater Res*, *23*, 25.  
700 doi:10.1186/s40824-019-0176-8
- 701 Choi, J. Y., Kim, J. Y., Kim, J. Y., Park, J., Lee, W. T., & Lee, J. E. (2017). M2 Phenotype  
702 Microglia-derived Cytokine Stimulates Proliferation and Neuronal Differentiation of  
703 Endogenous Stem Cells in Ischemic Brain. *Exp Neurobiol*, *26*(1), 33-41.  
704 doi:10.5607/en.2017.26.1.33
- 705 Covacu, R., & Brundin, L. (2017). Effects of Neuroinflammation on Neural Stem Cells.  
706 *Neuroscientist*, *23*(1), 27-39. doi:10.1177/1073858415616559
- 707 Donat, C. K., Scott, G., Gentleman, S. M., & Sastre, M. (2017). Microglial Activation in  
708 Traumatic Brain Injury. *Front Aging Neurosci*, *9*, 208. doi:10.3389/fnagi.2017.00208
- 709 Febinger, H. Y., Thomasy, H. E., Pavlova, M. N., Ringgold, K. M., Barf, P. R., George, A. M., . . .  
710 Gemma, C. (2015). Time-dependent effects of CX3CR1 in a mouse model of mild  
711 traumatic brain injury. *J Neuroinflammation*, *12*, 154. doi:10.1186/s12974-015-0386-  
712 5
- 713 Gabel, S., Koncina, E., Dorban, G., Heurtaux, T., Birck, C., Glaab, E., . . . Grandbarbe, L.  
714 (2016). Inflammation Promotes a Conversion of Astrocytes into Neural Progenitor  
715 Cells via NF-kappaB Activation. *Mol Neurobiol*, *53*(8), 5041-5055.  
716 doi:10.1007/s12035-015-9428-3
- 717 Hahm, S. C., Yoon, Y. W., & Kim, J. (2015). High-frequency transcutaneous electrical nerve  
718 stimulation alleviates spasticity after spinal contusion by inhibiting activated  
719 microglia in rats. *Neurorehabil Neural Repair*, *29*(4), 370-381.  
720 doi:10.1177/1545968314545172
- 721 Hofer, A. S., & Schwab, M. E. (2019). Enhancing rehabilitation and functional recovery after  
722 brain and spinal cord trauma with electrical neuromodulation. *Curr Opin Neurol*,  
723 *32*(6), 828-835. doi:10.1097/WCO.0000000000000750
- 724 Huang, Y., Li, Y., Chen, J., Zhou, H., & Tan, S. (2015). Electrical Stimulation Elicits Neural Stem  
725 Cells Activation: New Perspectives in CNS Repair. *Front Hum Neurosci*, *9*, 586.  
726 doi:10.3389/fnhum.2015.00586
- 727 Huffman, W. J., Subramaniyan, S., Rodriguiz, R. M., Wetsel, W. C., Grill, W. M., & Terrando,  
728 N. (2019). Modulation of neuroinflammation and memory dysfunction using  
729 percutaneous vagus nerve stimulation in mice. *Brain Stimul*, *12*(1), 19-29.  
730 doi:10.1016/j.brs.2018.10.005
- 731 Itoh, T., Satou, T., Hashimoto, S., & Ito, H. (2005). Isolation of neural stem cells from  
732 damaged rat cerebral cortex after traumatic brain injury. *Neuroreport*, *16*(15), 1687-  
733 1691. doi:10.1097/01.wnr.0000183330.44112.ab

- 734 Iwasa, S. N., Rashidi, A., Sefton, E., Liu, N. X., Popovic, M. R., & Morshead, C. M. (2019).  
735 Charge-Balanced Electrical Stimulation Can Modulate Neural Precursor Cell  
736 Migration in the Presence of Endogenous Electric Fields in Mouse Brains. *eNeuro*, 6(6).  
737 doi:Artn 0382-19.2019  
738 10.1523/Eneuro.0382-19.2019
- 739 Kumar, A., Alvarez-Croda, D. M., Stoica, B. A., Faden, A. I., & Loane, D. J. (2016).  
740 Microglial/Macrophage Polarization Dynamics following Traumatic Brain Injury. *J*  
741 *Neurotrauma*, 33(19), 1732-1750. doi:10.1089/neu.2015.4268
- 742 Limousin, P., Krack, P., Pollak, P., Benazzouz, A., Ardouin, C., Hoffmann, D., & Benabid, A. L.  
743 (1998). Electrical stimulation of the subthalamic nucleus in advanced Parkinson's  
744 disease. *N Engl J Med*, 339(16), 1105-1111. doi:10.1056/NEJM199810153391603
- 745 Liu, A., Jain, N., Vyas, A., & Lim, L. W. (2015). Ventromedial prefrontal cortex stimulation  
746 enhances memory and 5 hippocampal neurogenesis in the middle-aged rats. *Elife*, 4.  
747 doi:ARTN e04803  
748 10.7554/eLife.04803
- 749 Liu, X., Liu, J., Zhao, S., Zhang, H., Cai, W., Cai, M., . . . Hu, X. (2016). Interleukin-4 Is Essential  
750 for Microglia/Macrophage M2 Polarization and Long-Term Recovery After Cerebral  
751 Ischemia. *Stroke*, 47(2), 498-504. doi:10.1161/STROKEAHA.115.012079
- 752 Loane, D. J., & Kumar, A. (2016). Microglia in the TBI brain: The good, the bad, and the  
753 dysregulated. *Exp Neurol*, 275 Pt 3, 316-327. doi:10.1016/j.expneurol.2015.08.018
- 754 Loane, D. J., Kumar, A., Stoica, B. A., Cabatbat, R., & Faden, A. I. (2014). Progressive  
755 neurodegeneration after experimental brain trauma: association with chronic  
756 microglial activation. *J Neuropathol Exp Neurol*, 73(1), 14-29.  
757 doi:10.1097/NEN.0000000000000021
- 758 Lopez-Alvarez, V. M., Cobianchi, S., & Navarro, X. (2019). Chronic electrical stimulation  
759 reduces hyperalgesia and associated spinal changes induced by peripheral nerve  
760 injury. *Neuromodulation*, 22(5), 509-518. doi:10.1111/ner.12927
- 761 McKee, C. A., & Lukens, J. R. (2016). Emerging Roles for the Immune System in Traumatic  
762 Brain Injury. *Front Immunol*, 7, 556. doi:10.3389/fimmu.2016.00556
- 763 McLean, N. A., & Verge, V. M. (2016). Dynamic impact of brief electrical nerve stimulation  
764 on the neural immune axis-polarization of macrophages toward a pro-repair  
765 phenotype in demyelinated peripheral nerve. *Glia*, 64(9), 1546-1561.  
766 doi:10.1002/glia.23021
- 767 Merrill, D. R., Bikson, M., & Jefferys, J. G. (2005). Electrical stimulation of excitable tissue:  
768 design of efficacious and safe protocols. *J Neurosci Methods*, 141(2), 171-198.  
769 doi:10.1016/j.jneumeth.2004.10.020
- 770 Mokarram, N., & Bellamkonda, R. V. (2011). Overcoming endogenous constraints on  
771 neuronal regeneration. *IEEE Trans Biomed Eng*, 58(7), 1900-1906.  
772 doi:10.1109/TBME.2010.2103075
- 773 Mokarram, N., Dymanus, K., Srinivasan, A., Lyon, J. G., Tipton, J., Chu, J., . . . Bellamkonda, R.  
774 V. (2017). Immunoengineering nerve repair. *Proc Natl Acad Sci U S A*, 114(26),  
775 E5077-E5084. doi:10.1073/pnas.1705757114
- 776 Mukhatyar, V., Pai, B., Clements, I., Srinivasan, A., Huber, R., Mehta, A., . . . Bellamkonda, R.  
777 (2014). Molecular sequelae of topographically guided peripheral nerve repair. *Ann*  
778 *Biomed Eng*, 42(7), 1436-1455. doi:10.1007/s10439-013-0960-x
- 779 Nakagomi, T., Kubo, S., Nakano-Doi, A., Sakuma, R., Lu, S., Narita, A., . . . Matsuyama, T.  
780 (2015). Brain vascular pericytes following ischemia have multipotential stem cell



- 781 activity to differentiate into neural and vascular lineage cells. *Stem Cells*, 33(6), 1962-  
782 1974. doi:10.1002/stem.1977
- 783 National Center for Injury Prevention and Control (U.S.). (2003). *Report to Congress on mild*  
784 *traumatic brain injury in the United States : steps to prevent a serious public health*  
785 *problem*. In. Retrieved from <http://www.cdc.gov/ncipc/pub-res/mtbi/report.htm>  
786 <http://www.cdc.gov/ncipc/pub-res/mtbi/mtbireport.pdf>
- 787 Otto, K. J., & Schmidt, C. E. (2020). Neuron-targeted electrical modulation. *Science*,  
788 367(6484), 1303-1304. doi:10.1126/science.abb0216
- 789 Perego, C., Fumagalli, S., & De Simoni, M. G. (2011). Temporal pattern of expression and  
790 colocalization of microglia/macrophage phenotype markers following brain ischemic  
791 injury in mice. *J Neuroinflammation*, 8, 174. doi:10.1186/1742-2094-8-174
- 792 Posel, C., Moller, K., Boltze, J., Wagner, D. C., & Weise, G. (2016). Isolation and Flow  
793 Cytometric Analysis of Immune Cells from the Ischemic Mouse Brain. *J Vis Exp*(108),  
794 53658. doi:10.3791/53658
- 795 Sakuma, R., Kawahara, M., Nakano-Doi, A., Takahashi, A., Tanaka, Y., Narita, A., . . .  
796 Nakagomi, T. (2016). Brain pericytes serve as microglia-generating multipotent  
797 vascular stem cells following ischemic stroke. *Journal of Neuroinflammation*, 13.  
798 doi:ARTN 57  
799 10.1186/s12974-016-0523-9
- 800 Schiff, N. D., Giacino, J. T., Kalmar, K., Victor, J. D., Baker, K., Gerber, M., . . . Rezai, A. R.  
801 (2007). Behavioural improvements with thalamic stimulation after severe traumatic  
802 brain injury. *Nature*, 448(7153), 600-603. doi:10.1038/nature06041
- 803 Schimmel, S. J., Acosta, S., & Lozano, D. (2017). Neuroinflammation in traumatic brain  
804 injury: A chronic response to an acute injury. *Brain Circ*, 3(3), 135-142.  
805 doi:10.4103/bc.bc\_18\_17
- 806 Shimada, I. S., LeComte, M. D., Granger, J. C., Quinlan, N. J., & Spees, J. L. (2012). Self-  
807 renewal and differentiation of reactive astrocyte-derived neural stem/progenitor  
808 cells isolated from the cortical peri-infarct area after stroke. *J Neurosci*, 32(23), 7926-  
809 7940. doi:10.1523/JNEUROSCI.4303-11.2012
- 810 Simon, D. W., McGeachy, M. J., Bayir, H., Clark, R. S. B., Loane, D. J., & Kochanek, P. M.  
811 (2017). The far-reaching scope of neuroinflammation after traumatic brain injury.  
812 *Nat Rev Neurol*, 13(9), 572. doi:10.1038/nrneurol.2017.116
- 813 Vay, S. U., Flitsch, L. J., Rabenstein, M., Rogall, R., Blaschke, S., Kleinhaus, J., . . . Rueger, M.  
814 A. (2018). The plasticity of primary microglia and their multifaceted effects on  
815 endogenous neural stem cells in vitro and in vivo. *J Neuroinflammation*, 15(1), 226.  
816 doi:10.1186/s12974-018-1261-y
- 817 Wang, G., Zhang, J., Hu, X., Zhang, L., Mao, L., Jiang, X., . . . Chen, J. (2013).  
818 Microglia/macrophage polarization dynamics in white matter after traumatic brain  
819 injury. *J Cereb Blood Flow Metab*, 33(12), 1864-1874. doi:10.1038/jcbfm.2013.146
- 820 Xiang, Y., Liu, H. H., Yan, T. B., Zhuang, Z. Q., Jin, D. M., & Peng, Y. (2014). Functional  
821 electrical stimulation-facilitated proliferation and regeneration of neural precursor  
822 cells in the brains of rats with cerebral infarction. *Neural Regeneration Research*,  
823 9(3), 243-251. doi:10.4103/1673-5374.128215
- 824 Ydens, E., Cauwels, A., Asselbergh, B., Goethals, S., Peeraer, L., Lornet, G., . . . Janssens, S.  
825 (2012). Acute injury in the peripheral nervous system triggers an alternative  
826 macrophage response. *J Neuroinflammation*, 9, 176. doi:10.1186/1742-2094-9-176

25

- 827 Yi, X., Jin, G., Zhang, X., Mao, W., Li, H., Qin, J., . . . Zhang, F. (2013). Cortical endogenic  
828 neural regeneration of adult rat after traumatic brain injury. *PLoS One*, 8(7), e70306.  
829 doi:10.1371/journal.pone.0070306
- 830 Zhu, R., Sun, Z., Li, C., Ramakrishna, S., Chiu, K., & He, L. (2019). Electrical stimulation affects  
831 neural stem cell fate and function in vitro. *Exp Neurol*, 319, 112963.  
832 doi:10.1016/j.expneurol.2019.112963
- 833 Zinchuk, V., Zinchuk, O., & Okada, T. (2007). Quantitative colocalization analysis of  
834 multicolor confocal immunofluorescence microscopy images: pushing pixels to  
835 explore biological phenomena. *Acta Histochem Cytochem*, 40(4), 101-111.  
836 doi:10.1267/ahc.07002

838  
839

## 840 Graphical Abstract

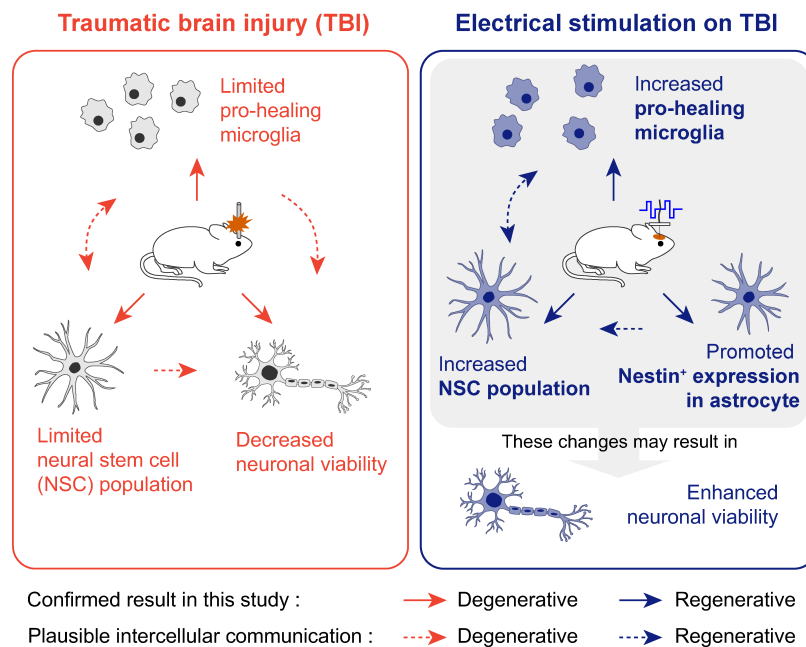

841  
842  
843  
844  
845  
846  
847  
848  
849  
850  
851  
852

## Table 1. Information on the antibodies used in this study



| <b>Antibody</b>             | <b>Immunogen Structure</b>                                                                                                                   | <b>Manufacturer</b> | <b>#cat/RRID</b>      | <b>Species</b>                | <b>Concentration</b> |
|-----------------------------|----------------------------------------------------------------------------------------------------------------------------------------------|---------------------|-----------------------|-------------------------------|----------------------|
| NeuN                        | Recombinant protein corresponding to mouse NeuN (further details proprietary)                                                                | Millipore-Sigma     | MABN140/AB_2571567    | Rabbit monoclonal IgG         | 1:400                |
| Nestin                      | E. coli-derived recombinant rat Nestin Met544-Glu820 (Gly756Asp, Ile758Met, Arg572Lys, Ala574Pro, Ile802Met, Arg816Lys) Accession # EDM00749 | Novus Biologicals   | MAB2736/AB_2282664    | Mouse monoclonal IgG2a        | 1:500                |
| GFAP                        | GFAP isolated from cow spinal cord                                                                                                           | Dako (Agilent)      | Z033429-2/AB_10013382 | Rabbit polyclonal Ig fraction | 1:1000               |
| CD68                        | Rat spleen cells                                                                                                                             | BioRad              | MCA341R/AB_2291300    | Mouse monoclonal IgG1         | 1:400                |
| CD206                       | Synthetic peptide conjugated to KLH derived from within residues 1400 to the C-terminus of Human Mannose Receptor                            | Abcam               | Ab64693/AB_1523910    | Rabbit polyclonal IgG         | 1:500                |
| Alexa Fluor 488 anti-rabbit | Details not available from manufacturer                                                                                                      | Abcam               | Ab150081/AB_2734747   | Goat polyclonal IgG           | 1:400                |
| Alexa Fluor 594 anti-mouse  | Details not available from manufacturer                                                                                                      | Abcam               | Ab150116/AB_2650601   | Goat polyclonal IgG           | 1:220                |

|                              |                                                                                                          |                   |                    |                          |                             |
|------------------------------|----------------------------------------------------------------------------------------------------------|-------------------|--------------------|--------------------------|-----------------------------|
| CD16/32<br>(Fc-<br>Receptor) | Sorted pre-B<br>cells                                                                                    | Biolegend         | 101301/AB_312800   | Rat IgG2a,<br>$\lambda$  | 2.5 $\mu\text{g}/\text{mL}$ |
| PE-Cy7<br>anti-<br>CD45      | Leukocyte<br>Common<br>Antigen-<br>enriched<br>Glycoprotein<br>Fraction from<br>Wistar Rat<br>Thymocytes | BD<br>Biosciences | 561588/AB_10893200 | Mouse<br>BALB/c<br>IgG1K | 1 $\mu\text{g}/\text{mL}$   |

854 **Table 2. The number of CD68<sup>+</sup>, CD206<sup>+</sup>, CD68<sup>+</sup>CD206<sup>+</sup>, and CD68<sup>-</sup>CD206<sup>+</sup> cells in the**  
 855 **perilesional cortex. Data are reported as Mean  $\pm$  SD. N = 4, 3, 6 animals with two tissue**  
 856 **lices analyzed for untreated TBI, sham, ES.**

| Phenotype                                           | ROI                        | Number of cells (cells/mm <sup>2</sup> ) |                   |                   | <i>p</i> -values  |                             |                             |
|-----------------------------------------------------|----------------------------|------------------------------------------|-------------------|-------------------|-------------------|-----------------------------|-----------------------------|
|                                                     |                            | TBI                                      | sham              | ES                | TBI vs. sham      | TBI vs. ES                  | sham vs. ES                 |
| CD68 <sup>+</sup><br>(Figure 2e)                    | entire perilesional cortex | 711.1 $\pm$ 351.1                        | 801.1 $\pm$ 458.5 | 740.9 $\pm$ 342.6 | <i>p</i> > 0.9999 | <i>p</i> > 0.9999           | <i>p</i> > 0.9999           |
| CD206 <sup>+</sup><br>(Figure 2f)                   |                            | 295.0 $\pm$ 276.6                        | 297.6 $\pm$ 438.4 | 683.3 $\pm$ 396.3 | <i>p</i> > 0.9999 | <b><i>p</i> &lt; 0.0001</b> | <b><i>p</i> &lt; 0.0001</b> |
| CD68 <sup>+</sup> CD206 <sup>+</sup><br>(Figure 2g) |                            | 182.3 $\pm$ 207.0                        | 227.9 $\pm$ 420.9 | 456.0 $\pm$ 304.0 | <i>p</i> > 0.9999 | <b><i>p</i> &lt; 0.0001</b> | <b><i>p</i> &lt; 0.0001</b> |
| CD68 <sup>-</sup> CD206 <sup>+</sup><br>(Figure 2h) |                            | 112.6 $\pm$ 113.5                        | 69.7 $\pm$ 66.8   | 227.3 $\pm$ 165.4 | <i>p</i> = 0.3664 | <b><i>p</i> &lt; 0.0001</b> | <b><i>p</i> &lt; 0.0001</b> |

Kruskal-Wallis one-way ANOVA with Dunn's post-hoc analysis.

858 **Table 3. Region- or treatment-dependent expression in CD68<sup>+</sup>, CD206<sup>+</sup>, CD68<sup>+</sup>CD206<sup>+</sup>,**  
 859 **and CD68<sup>-</sup>CD206<sup>+</sup> cells.** Data are reported as Mean  $\pm$  SD. N = 4, 3, 6 animals with two  
 860 tissue slices analyzed for untreated TBI, sham, ES.

| Phenotype                                           | ROI              | Number of cells (cells/mm <sup>2</sup> ) |                          |                          | p-values             |                              |                              |
|-----------------------------------------------------|------------------|------------------------------------------|--------------------------|--------------------------|----------------------|------------------------------|------------------------------|
|                                                     |                  | TBI                                      | sham                     | ES                       | TBI vs. sham         | TBI vs. ES                   | sham vs. ES                  |
| CD68 <sup>+</sup><br>(Figure 3c)                    | ROI <sub>1</sub> | 646.5 $\pm$<br>344.5                     | 825.1 $\pm$<br>548.3     | 837.8 $\pm$<br>381.1     | <i>p</i> =<br>0.7278 | <i>p</i> =<br>0.4426         | <i>p</i> ><br>0.9999         |
|                                                     | ROI <sub>2</sub> | 761.9 $\pm$<br>351.2                     | 775.2 $\pm$<br>358.3     | 644.1 $\pm$<br>271.6     | <i>p</i> ><br>0.9999 | <i>p</i> =<br>0.8582         | <i>p</i> =<br>0.8833         |
| p-values (ROI <sub>1</sub> vs. ROI <sub>2</sub> )   |                  | <i>p</i> = 0.9144                        | <i>p</i> = 0.9993        | <i>p</i> = 0.2700        |                      |                              |                              |
| CD206 <sup>+</sup><br>(Figure 3d)                   | ROI <sub>1</sub> | 427.9 $\pm$<br>211.5                     | 505.8 $\pm$<br>534.6     | 791.5 $\pm$<br>424.4     | <i>p</i> =<br>0.9876 | <b><i>p</i> =<br/>0.0044</b> | <i>p</i> =<br>0.1114         |
|                                                     | ROI <sub>2</sub> | 174.1 $\pm$<br>277.0                     | 73.4 $\pm$<br>42.6       | 575.0 $\pm$<br>338.6     | <i>p</i> =<br>0.9620 | <b><i>p</i> =<br/>0.0007</b> | <b><i>p</i> =<br/>0.0003</b> |
| p-values (ROI <sub>1</sub> vs. ROI <sub>2</sub> )   |                  | <i>p</i> = 0.1783                        | <b><i>p</i> = 0.0194</b> | <i>p</i> = 0.1241        |                      |                              |                              |
| CD68 <sup>+</sup> CD206 <sup>+</sup><br>(Figure 3e) | ROI <sub>1</sub> | 254.3 $\pm$<br>154.2                     | 404.8 $\pm$<br>532.6     | 511.1 $\pm$<br>334.4     | <i>p</i> =<br>0.6752 | <b><i>p</i> =<br/>0.0276</b> | <i>p</i> =<br>0.8645         |
|                                                     | ROI <sub>2</sub> | 117.8 $\pm$<br>230.3                     | 37.4 $\pm$<br>26.3       | 400.9 $\pm$<br>263.9     | <i>p</i> =<br>0.9697 | <b><i>p</i> =<br/>0.0079</b> | <b><i>p</i> =<br/>0.0031</b> |
| p-values (ROI <sub>1</sub> vs. ROI <sub>2</sub> )   |                  | <i>p</i> = 0.6667                        | <b><i>p</i> = 0.0177</b> | <i>p</i> = 0.6466        |                      |                              |                              |
| CD68 <sup>-</sup> CD206 <sup>+</sup><br>(Figure 3f) | ROI <sub>1</sub> | 174.6 $\pm$<br>127.1                     | 101.1 $\pm$<br>77.4      | 280.4 $\pm$<br>189.6     | <i>p</i> =<br>0.5537 | <b><i>p</i> =<br/>0.0423</b> | <b><i>p</i> =<br/>0.0003</b> |
|                                                     | ROI <sub>2</sub> | 56.3 $\pm$<br>59.7                       | 36.0 $\pm$<br>27.9       | 174.2 $\pm$<br>117.4     | <i>p</i> =<br>0.9974 | <b><i>p</i> =<br/>0.0117</b> | <b><i>p</i> =<br/>0.0137</b> |
| p-values (ROI <sub>1</sub> vs. ROI <sub>2</sub> )   |                  | <b><i>p</i> = 0.0342</b>                 | <i>p</i> = 0.7636        | <b><i>p</i> = 0.0108</b> |                      |                              |                              |
| Two-way ANOVA tests with Tukey post-hoc analysis.   |                  |                                          |                          |                          |                      |                              |                              |

861

862

863

864 **Table 4. Proportion of CD68<sup>+</sup>CD206<sup>+</sup> cells relative to CD68<sup>+</sup> and CD206<sup>+</sup> cells as shown**  
 865 **in Figure 3g.** Data are reported as Mean  $\pm$  SEM. N = 4, 3, 6 animals with two tissue slices  
 866 analyzed for untreated TBI, sham, ES.

|                                              |                  | Proportion of CD68 <sup>+</sup> CD206 <sup>+</sup> (%) |                 |                | p-values          |                             |                             |
|----------------------------------------------|------------------|--------------------------------------------------------|-----------------|----------------|-------------------|-----------------------------|-----------------------------|
|                                              |                  | TBI                                                    | sham            | ES             | TBI vs. sham      | TBI vs. ES                  | sham vs. ES                 |
| relative to CD68 <sup>+</sup>                | ROI <sub>1</sub> | 41.0 $\pm$ 11.7                                        | 44.9 $\pm$ 13.4 | 60.0 $\pm$ 6.7 | <i>p</i> = 0.9448 | <i>p</i> = 0.1785           | <i>p</i> = 0.3952           |
|                                              | ROI <sub>2</sub> | 11.0 $\pm$ 4.6                                         | 4.3 $\pm$ 0.8   | 61.0 $\pm$ 5.3 | <i>p</i> = 0.8474 | <b><i>p</i> &lt; 0.0001</b> | <b><i>p</i> &lt; 0.0001</b> |
| relative to CD206 <sup>+</sup>               | ROI <sub>1</sub> | 54.3 $\pm$ 7.9                                         | 68.8 $\pm$ 9.1  | 63.9 $\pm$ 4.1 | <i>p</i> = 0.4180 | <i>p</i> = 0.5956           | <i>p</i> = 0.8901           |
|                                              | ROI <sub>2</sub> | 49.3 $\pm$ 12.0                                        | 48.9 $\pm$ 9.1  | 68.8 $\pm$ 3.7 | <i>p</i> = 0.9994 | <i>p</i> = 0.1175           | <i>p</i> = 0.1545           |
| two-way ANOVA with Tukey's post-hoc analysis |                  |                                                        |                 |                |                   |                             |                             |

867

868

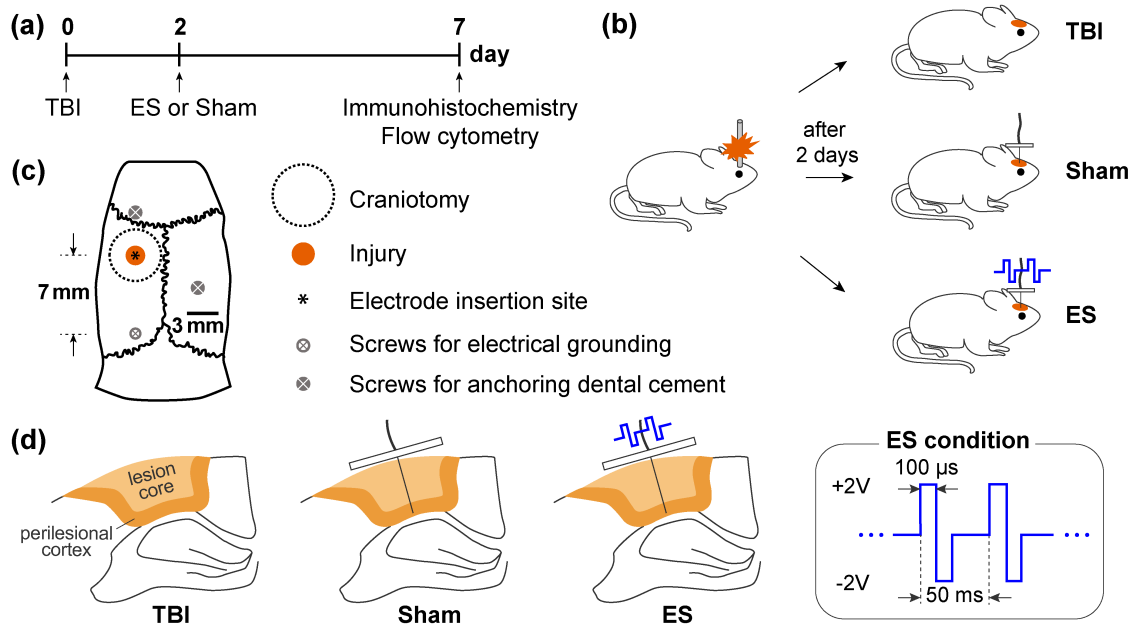

869  
870  
871  
872  
873  
874  
875  
876  
877  
878  
879  
880

**FIGURE 1. Experimental design.** (a) Timing of experiments, including traumatic brain injury (TBI) induction, sham and electrical stimulation (ES) operations, and analysis. (b) All animals received a controlled cortical impact (CCI) for the TBI. In two days post-TBI, rats were randomly divided into three groups: untreated TBI (untreated control group), sham (TBI with an implanted electrode without ES), and ES (TBI with applied electrical stimulation through the implanted electrode) groups. (c) Schematic of contusion region induced by CCI system and the position of the inserted electrode on a rat skull. Screws used to anchor the dental cement or connect the electrical grounding. (d) Schematic of the coronal section of perilesional brain to show an inserted electrode and ES conditions.

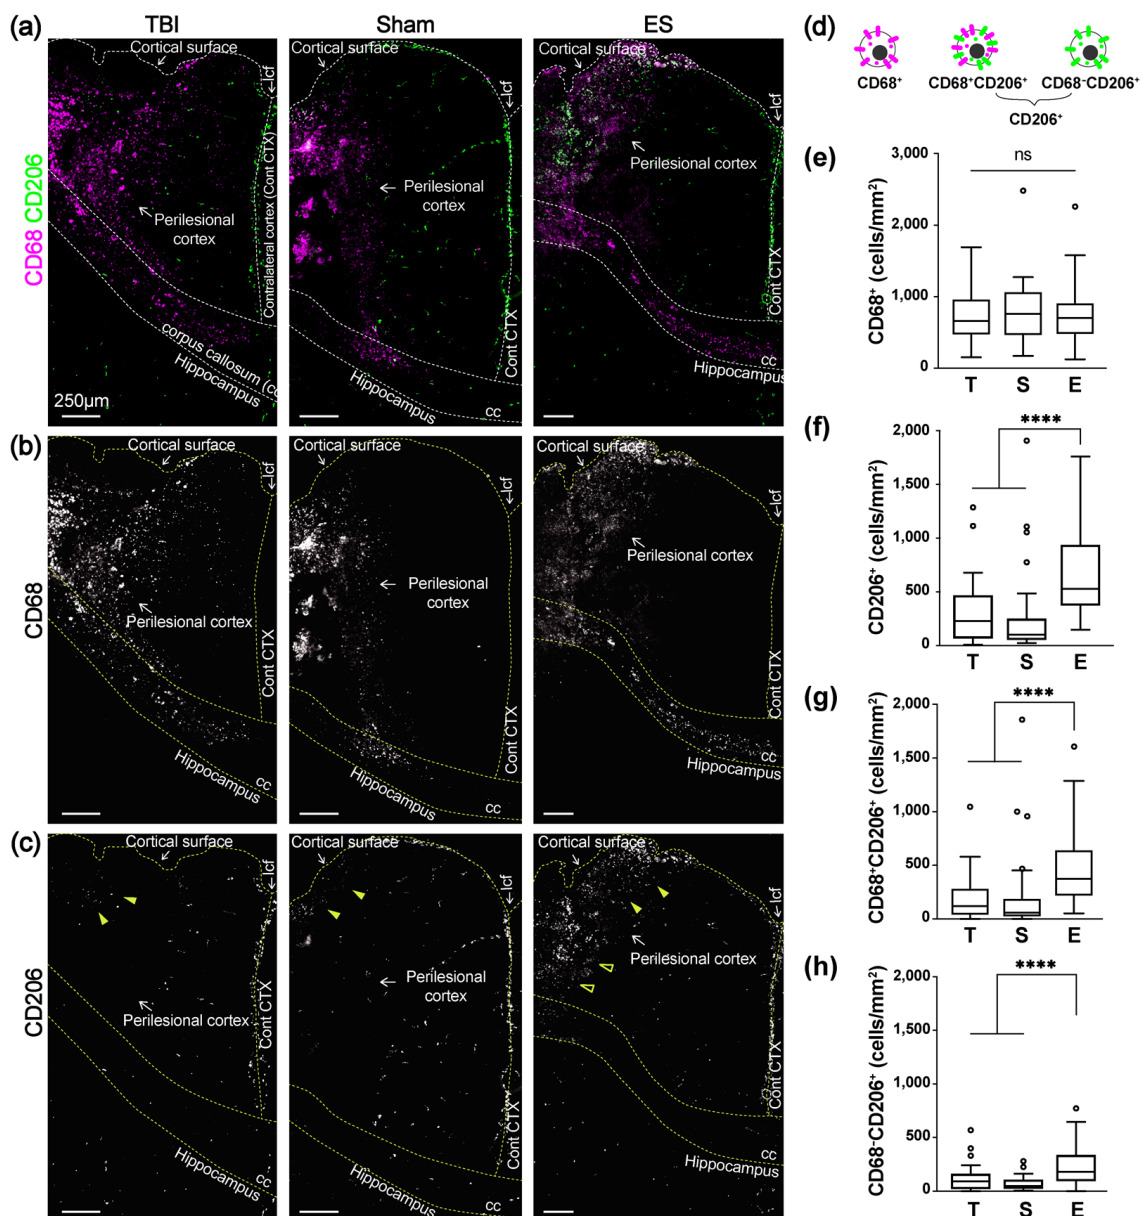

881  
882  
883  
884  
885  
886  
887  
888  
889  
890  
891  
892  
893  
894  
895  
896  
897  
898

**FIGURE 2. Effect of ES treatment on CD68 and CD206 expression in perilesional cortex at 7 days post-TBI.** (a) Representative low magnification images of CD68 (magenta) and CD206 (green) staining from the ipsilateral cortex to the hippocampus. (b) CD68<sup>+</sup> cells mostly appeared at the perilesional cortex and corpus callosum (cc), but not in the hippocampus. CD68<sup>+</sup> cells were shown to be distributed similarly in all experimental groups. (c) CD206<sup>+</sup> cells appeared relatively less than CD68, and they were observed at the longitudinal cerebral fissure (lcf), ipsilateral cortex, and hippocampus. Within the perilesional cortex, CD206<sup>+</sup> cells were observed near the cortical surfaces in all experimental groups (filled arrowheads). On the other hand, CD206<sup>+</sup> cells at the deeper cortex were only observed in the ES group (empty arrowheads). (d) Illustration of three subtypes of immune cells based on CD68 and CD206 expression. (e-h) The number of subtype cells across the entire perilesional cortex. T, S, and E on the x-axis represent untreated TBI, sham and ES groups. (e) The number of CD68<sup>+</sup> monocyte/macrophages/microglia did not exhibit a significant difference by treatment. In the entire perilesional cortex, the number of (f) CD206<sup>+</sup> cells, (g) CD68<sup>+</sup>CD206<sup>+</sup> cells, and (h) CD68<sup>-</sup>CD206<sup>+</sup> cells significantly increased after ES treatment. Data are represented as mean  $\pm$  SD. N = 4, 3, 6 animals with two tissue slices analyzed for untreated TBI, sham, ES; \*\*\*\*  $p < 0.0001$ , Kruskal-Wallis one-way ANOVA with Dunn's post-hoc analysis.



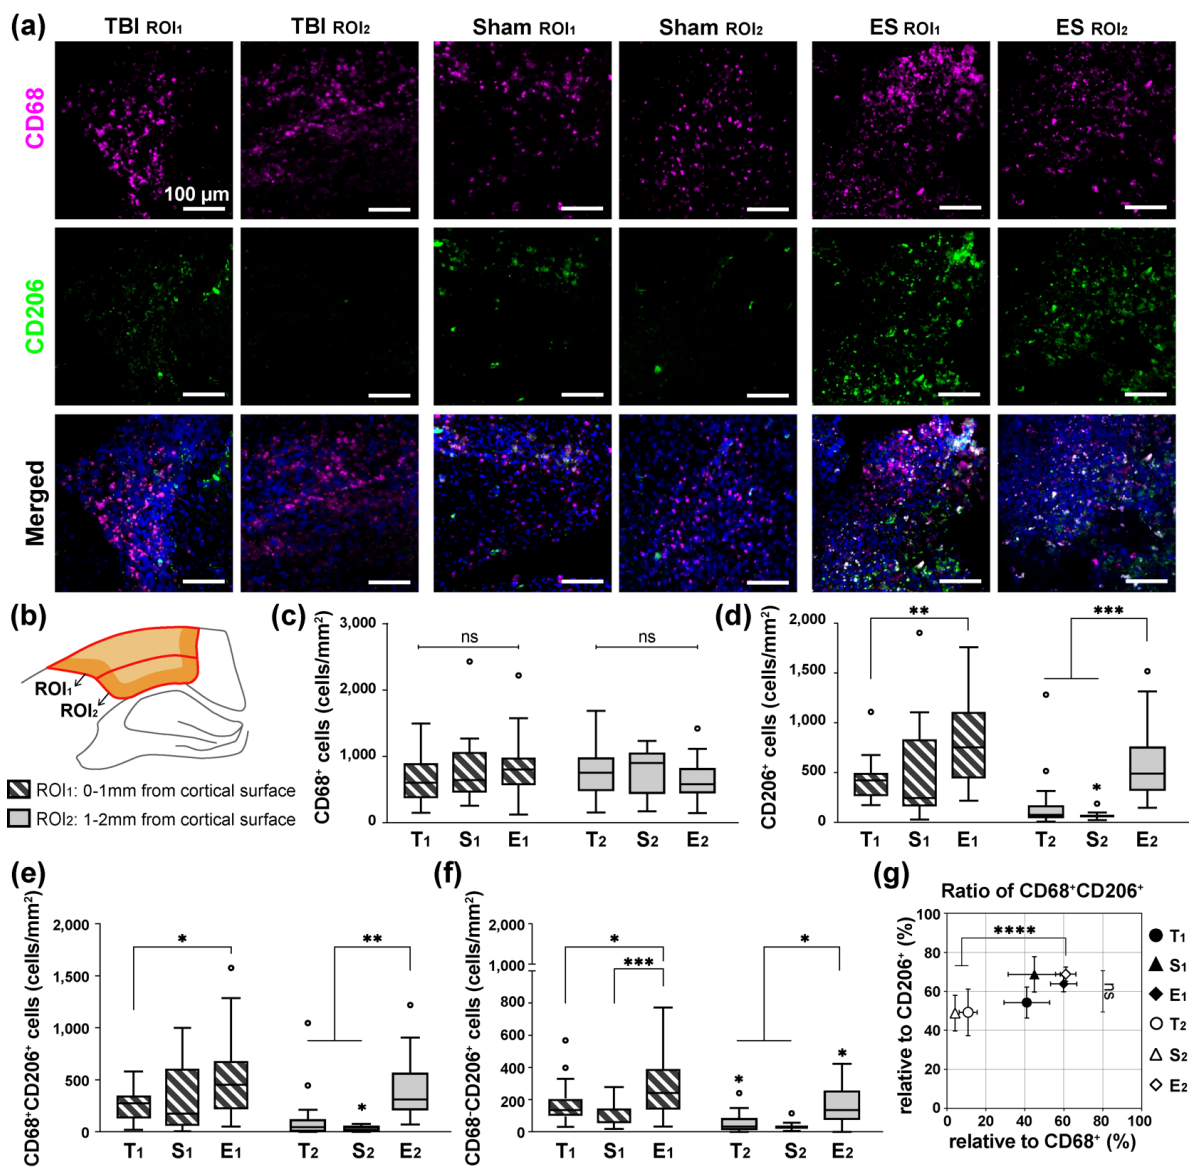

899  
900  
901  
902  
903  
904  
905  
906  
907  
908  
909  
910  
911  
912  
913  
914  
915  
916  
917  
918

**FIGURE 3. Region- or treatment-dependent expression in CD68 and CD206 at 7 days post-TBI.** (a) Representative fluorescence images of CD68 (magenta), CD206 (green), and DAPI (blue) in ROI<sub>1</sub> and ROI<sub>2</sub>. The detailed description of ROIs is included in the same Figure 3 (b). (b) Within the perilesional region, the analyzing window was divided in two: ROI<sub>1</sub> and ROI<sub>2</sub>, positioned within 0-1 and 1-2 mm from the cortex, respectively. T, S, and E on the x-axis (c-f) or next to symbol (g) represent untreated TBI, sham and ES groups and a lower subscript 1 and 2 represent ROI<sub>1</sub> and ROI<sub>2</sub>. (c) The number of CD68<sup>+</sup> cells was not region- or treatment-dependent. (d) The number of CD206<sup>+</sup> cells. Within the ROI<sub>1</sub>, ES treatment increased the number of CD206<sup>+</sup> cells compared to untreated TBI, but not significant with sham. Instead, within the ROI<sub>2</sub>, CD206<sup>+</sup> cells significantly increased by the ES treatment compared to TBI and sham groups. (e) The number of CD68<sup>+</sup>CD206<sup>+</sup> cells showed a similar trend with CD206<sup>+</sup> as shown in Figure d. (f) The number of CD68<sup>+</sup>CD206<sup>+</sup> cells apparently increased by ES treatment compared to untreated TBI and sham groups in both ROI<sub>1</sub> and ROI<sub>2</sub>. (g) The proportion of the CD68<sup>+</sup>CD206<sup>+</sup> cells relative to the CD68<sup>+</sup> (x-axis) and CD206<sup>+</sup> (y-axis) cells. Treatment did not affect the proportion of CD68<sup>+</sup>CD206<sup>+</sup> cells to CD68<sup>+</sup> cells in ROI<sub>1</sub>, but ES treatment effectively increased those values in ROI<sub>2</sub>. However, there was no significant difference in the proportion of CD68<sup>+</sup>CD206<sup>+</sup> cells to CD206<sup>+</sup> cells. Data are represented as mean ± SD for Figure c-f and mean ± SEM for Figure g. N = 4, 3, 6 animals with two tissue slices analyzed for untreated TBI, sham, ES. 3-5 images were taken from each ROI; \* *p* < 0.05,

34

919 \*\*  $p < 0.01$ , \*\*\*  $p < 0.001$ , \*\*\*\*  $p < 0.0001$ , Two-way ANOVA tests with Tukey post-hoc  
920 analysis.

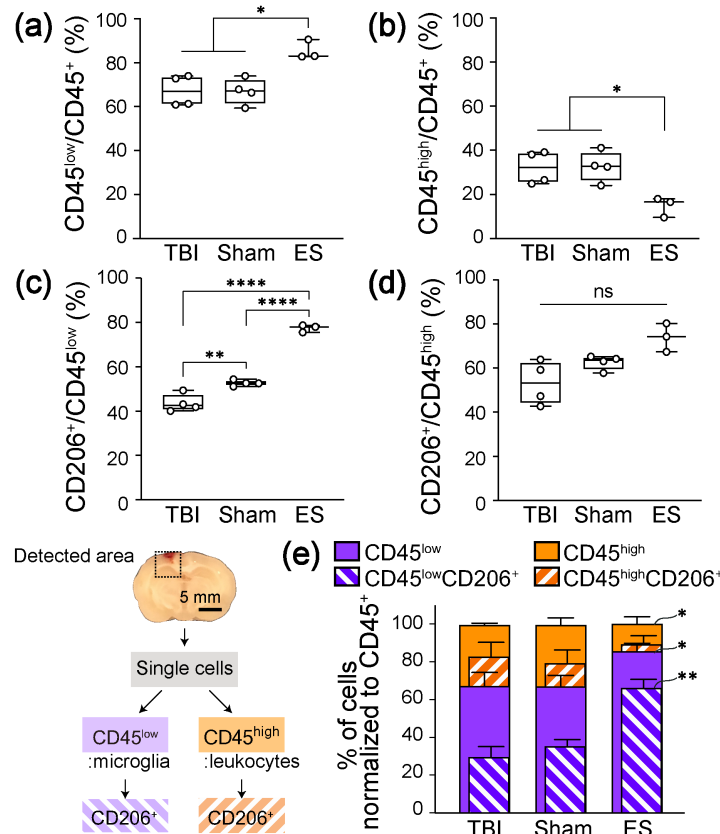

921

922

923

924

925

926

927

928

929

930

931

932

933

934

935

936

**FIGURE 4. Flow cytometric analysis to identify the population of immune cell subtypes and their CD206<sup>+</sup> population at 7 days post-TBI.** The detected area for flow cytometry included the perilesional cortex and the ipsilateral hippocampus. The sliced tissue shows the coronal plane of the center of the injury. (a, b) Following the ES treatment, the change in the proportion of immune cells that (a) CD45<sup>low</sup> microglia increase, while the (b) CD45<sup>high</sup> leukocytes decrease. (c, d) The proportion of CD206<sup>+</sup> cells to the CD45<sup>low</sup> and CD45<sup>high</sup> cells, respectively. In sham and ES groups, more microglia expressed CD206 (c), whereas leukocytes did not show significant phenotypic changes (d). (e) The normalized graph of immune cell subtypes and their CD206<sup>+</sup> population to the CD45<sup>+</sup> cells. ES treatment showed a significant increase in the CD45<sup>low</sup>CD206<sup>+</sup> cells. Graphs are shown as Min to Max with all points for Figure a-d and mean  $\pm$  SD for Figure e. N = 4, 4, 3 animals analyzed for untreated TBI, sham, ES; \*  $p < 0.05$ , \*\*  $p < 0.01$ , \*\*\*  $p < 0.001$ , \*\*\*\*  $p < 0.0001$ , Welch ANOVA tests with Dunnett post-hoc analysis.

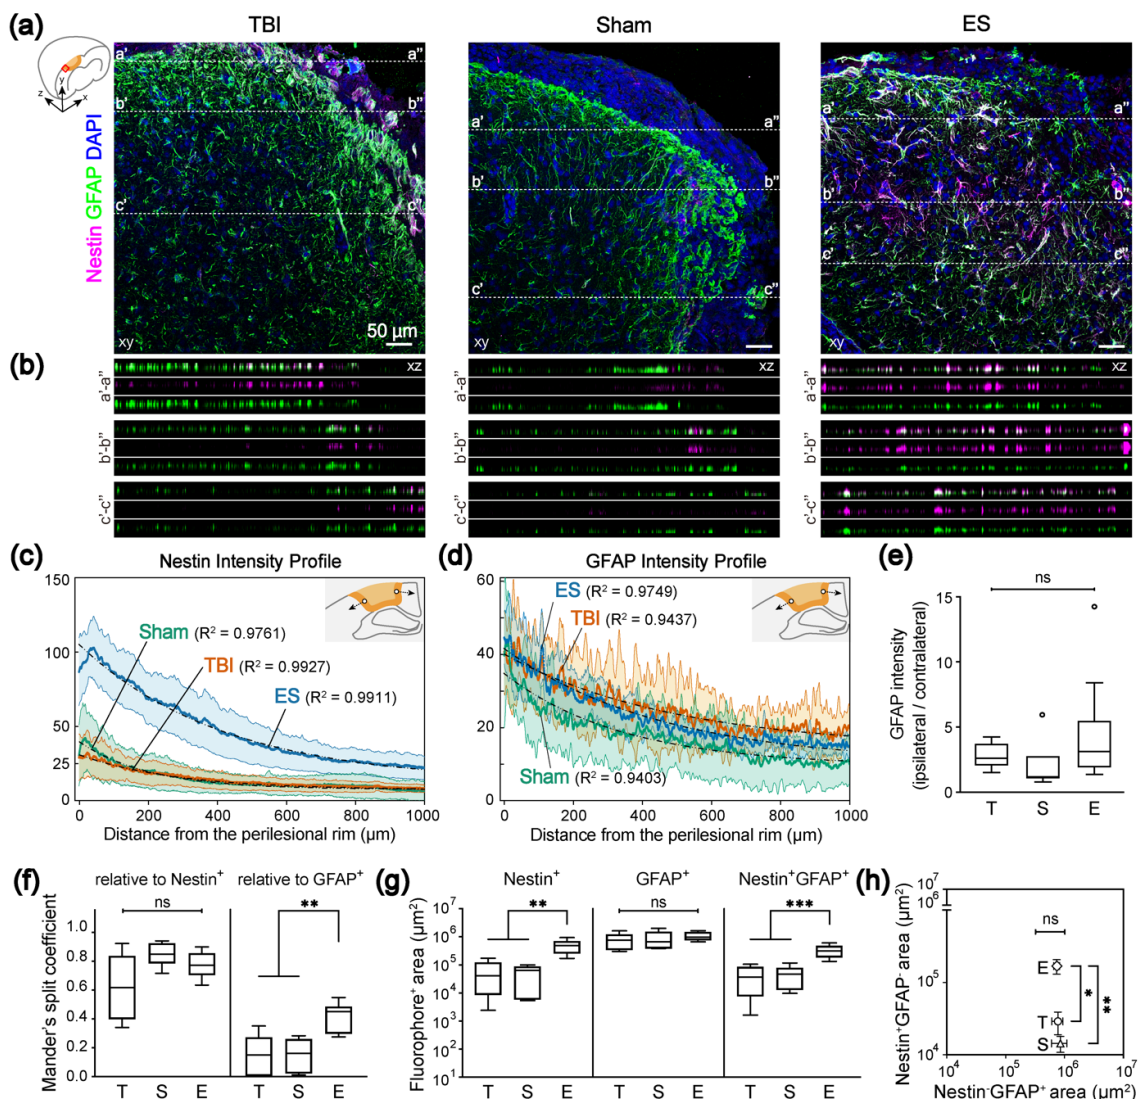

937  
938  
939  
940  
941  
942  
943  
944  
945  
946  
947  
948  
949  
950  
951  
952  
953  
954  
955  
956  
957  
958

**FIGURE 5. Increased Nestin<sup>+</sup> and Nestin<sup>+</sup>GFAP<sup>+</sup> cells in the perilesional cortex at 7 days post-TBI by ES treatment.** (a) Representative z-projection (xy) confocal images of the perilesional cortex. Magenta, green, and blue represent Nestin, GFAP, and DAPI, respectively. In Figure a, three representative positions (a-a', b-b', c-c') were chosen to show the differential voxel distribution and their orthogonal views (xz) of the dotted lines in each z-projection image are in Figure b. (b) Images are listed in order of merged, magenta, and green from the top. From the xz-section images, it was confirmed that Nestin<sup>+</sup> voxels are coincident with GFAP<sup>+</sup> voxels (The total depth of z-stack images: 4, 4, and 7  $\mu\text{m}$  in TBI, sham, and ES groups. The step size: 1  $\mu\text{m}$ ). Mean profiles of (c) Nestin and (d) GFAP intensity and 95 % confidence intervals (shaded bands). The schematics for the analysis of gradual changes in Nestin and GFAP expression are illustrated in each figure: the blank circle and the arrow indicate the initial point and the direction of analysis, respectively. In all experimental groups, mean intensity was fit to the one-phase exponential decay curve, and their R-squared values are shown on the graph. (e-g) T, S, and E on the x-axis represent untreated TBI, sham and ES groups. (e) GFAP intensity ratio of ipsilateral/contralateral cortex was larger than 1, but was not significant among groups, indicating that TBI induced astrocyte activation at the perilesional cortex, but sham or ES operations did not induce additional activation. (f) The degree of GFAP- and Nestin-concurrent signals with Nestin (left) and GFAP (right), respectively. There was no significant difference in the Mander's split coefficient relative to Nestin<sup>+</sup> pixels, whereas more GFAP<sup>+</sup> cells appeared to express Nestin signals in the ES group compared to the TBI and sham groups. (g) Quantitative analysis of Nestin<sup>+</sup>, GFAP<sup>+</sup>, Nestin<sup>+</sup>GFAP<sup>+</sup> area. Nestin<sup>+</sup> and

959 Nestin<sup>+</sup>GFAP<sup>+</sup> area showed a treatment-dependent change, an increase by the ES treatment.  
960 (h) Nestin<sup>-</sup>GFAP<sup>+</sup> area (x-axis) and Nestin<sup>+</sup>GFAP<sup>-</sup> area (y-axis). T, S, and E next in graph  
961 represent untreated TBI, sham, and ES groups. There was no significant difference in Nestin<sup>-</sup>  
962 GFAP<sup>+</sup> area, whereas Nestin<sup>+</sup>GFAP<sup>-</sup> area of ES group was significantly larger than untreated  
963 TBI and sham groups. Data are represented as mean  $\pm$  SD for Figure e-g, and mean  $\pm$  SEM  
964 for Figure h. N = 4, 3, 6 animals with two tissue slices analyzed for untreated TBI, sham, ES;  
965 \*  $p < 0.05$ , \*\*  $p < 0.01$ , \*\*\*  $p < 0.001$ , Kruskal-Wallis one-way ANOVA with Dunn's post-  
966 hoc analysis for Figure e and Welch ANOVA with Dunnett post-hoc analysis for others.



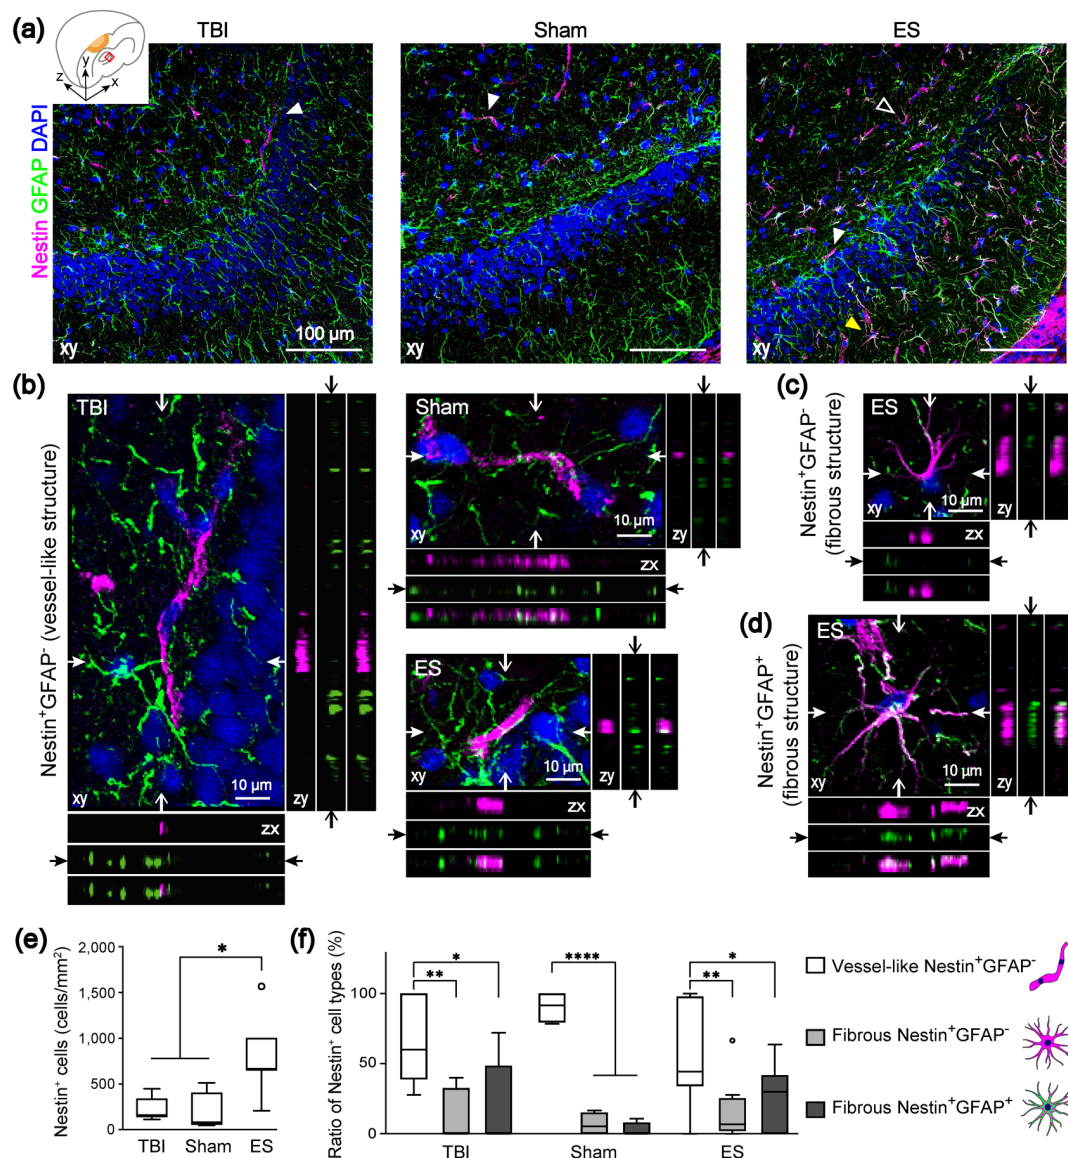

967  
968  
969  
970  
971  
972  
973  
974  
975  
976  
977  
978  
979  
980  
981  
982  
983  
984  
985

**FIGURE 6. The phenotypes of Nestin<sup>+</sup> cells in the ipsilateral hippocampus at 7 days post-TBI.** Magenta, green, and blue represent Nestin, GFAP, and DAPI, respectively. (a) Representative z-projection (xy) confocal images of the ipsilateral hippocampus. (b-d) Three representative phenotypes of Nestin<sup>+</sup> cells, marked with arrowheads in Figure a. In each z-projection (xy) image, the orthogonal views of the position indicated by arrows are on the bottom (zx) and right (zy) panels. In each bottom and right panels, images are listed in order of magenta, green and merged from the top and left, respectively (The total depth of z-stack images: 4  $\mu\text{m}$ , the step size: 1  $\mu\text{m}$ ). (b) White arrowhead in Figure a indicates Nestin<sup>+</sup>GFAP<sup>-</sup> cells, featuring vessel-like structure. A white empty or yellow arrowhead in Figure a indicates fibrous Nestin<sup>+</sup>GFAP<sup>-</sup> cells (c) or fibrous Nestin<sup>+</sup>GFAP<sup>+</sup> cells (d) that feature multiple processes. (e) Quantitative analysis of the number of Nestin<sup>+</sup> cells in the ROI of a hippocampus revealed that ES treatment increased the number of Nestin<sup>+</sup> cells. (f) The phenotypic ratio of Nestin<sup>+</sup> cells within a group. Nestin<sup>+</sup> cells found in the hippocampus were mostly vessel-like structural Nestin<sup>+</sup>GFAP<sup>-</sup> cell. Data are represented as mean  $\pm$  SD. N = 4, 3, 6 animals with two tissue slices analyzed for untreated TBI, sham, ES; \*  $p < 0.05$ , \*\*  $p < 0.01$ , \*\*\*  $p < 0.001$ , \*\*\*\*  $p < 0.0001$ , Kruskal-Wallis one-way ANOVA with Dunn's post-hoc analysis in Figure e, and Two-way ANOVA tests with Tukey post-hoc analysis in Figure f.



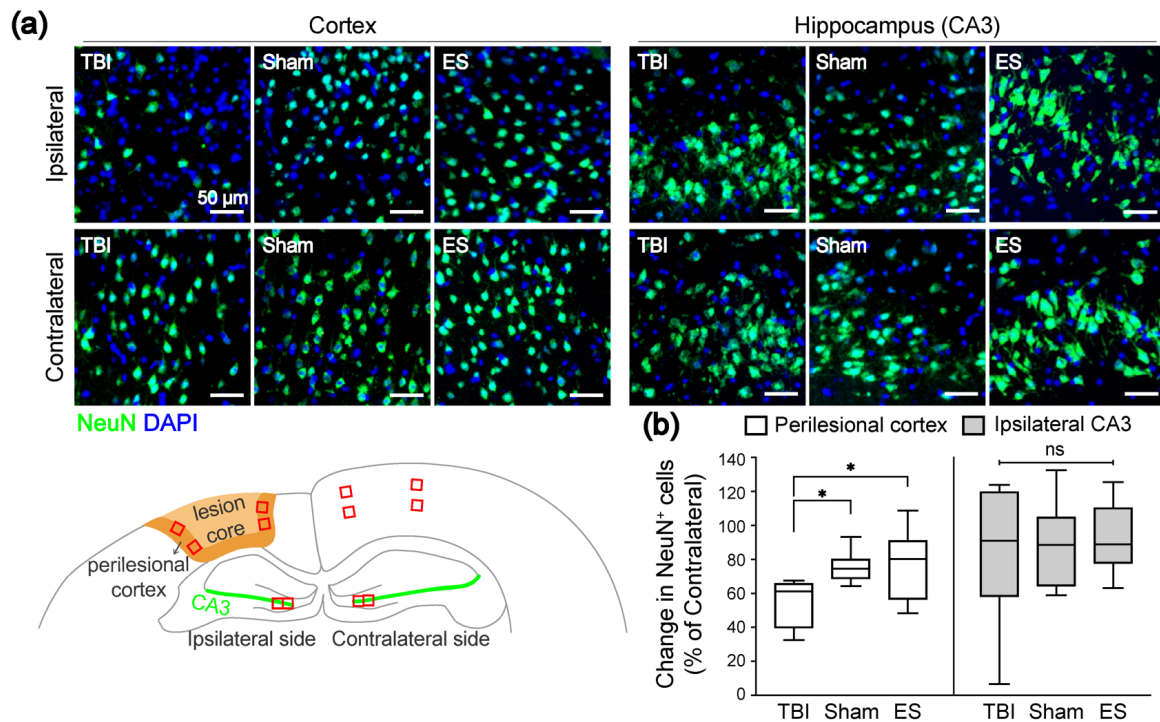

986  
987  
988  
989  
990  
991  
992  
993  
994  
995  
996  
997  
998  
999

**FIGURE 7. Effect of treatment on neuronal viability in the ipsilateral cortex and hippocampus at seven days post-TBI.** (a) Representative fluorescence images of NeuN<sup>+</sup> neurons (green) in the cortex (left three columns) and CA3 in the hippocampus (right three columns). The images in the first row and second row represent the NeuN in the ipsilateral and contralateral sides, respectively. (b) Quantitative analysis of the change in the number of NeuN<sup>+</sup> cells in the ipsilateral ROI compared to the contralateral side. In the ipsilateral cortex, NeuN<sup>+</sup> cells remained more in the sham and ES groups compared to untreated TBI group. On the other hand, the changes of NeuN<sup>+</sup> cells in the ipsilateral CA3 region were not significantly different across the groups. For the analysis of NeuN<sup>+</sup> cells, four ROIs were taken from each ipsilateral and contralateral cortices, and two ROIs were taken from each ipsilateral and contralateral CA3 regions. N = 4, 3, 6 animals with two coronal sections analyzed for untreated TBI, sham, ES; \*  $p < 0.05$ , Kruskal-Wallis one-way ANOVA with Dunn's post-hoc analysis.

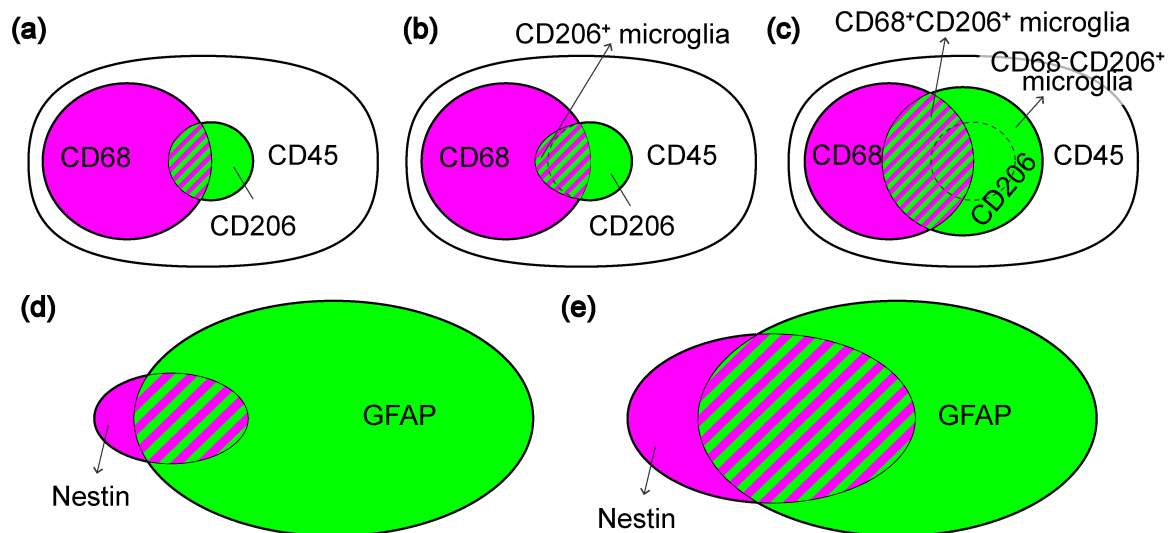

1000  
1001 **FIGURE 8. Summary of inflammatory marker and Nestin/GFAP expression at seven**  
1002 **days post-TBI.** (a-c) CD45, CD68, and CD206 expression identified by  
1003 immunohistochemistry (Figure 2,3) and flow cytometry (Figure 4). Shaded bands represent  
1004 CD68<sup>+</sup>CD206<sup>+</sup> population among CD45<sup>+</sup> cells. CD45 is a general marker for microglia and  
1005 leukocytes. CD68 is expressed in phagocytic microglia and leukocyte subtypes  
1006 (macrophage/monocyte). (a) The Venn-diagram shows a small CD206<sup>+</sup> population among  
1007 either CD68<sup>+</sup> or CD45<sup>+</sup> cells in untreated TBI. (b) In the sham group, increased CD206<sup>+</sup>  
1008 microglia confirmed by flow cytometry is depicted within CD68 population, given the slight  
1009 increase in CD68<sup>+</sup>CD206<sup>+</sup> population in ROI<sub>1</sub> (Figure 3e). (c) By ES treatment, CD206  
1010 population greatly increases among both CD68<sup>+</sup> and CD68<sup>-</sup> cells compared to untreated TBI  
1011 and sham groups, which is shown to be induced by microglia. (d, e) Nestin and GFAP  
1012 expression. Shaded bands represent Nestin<sup>+</sup>GFAP<sup>+</sup> population. (d) The Venn-diagram shows  
1013 smaller Nestin<sup>+</sup> cells than GFAP<sup>+</sup> cells in TBI and sham groups (Figure 5g). Also,  
1014 Nestin<sup>+</sup>GFAP<sup>+</sup> cells have been derived from either Nestin<sup>+</sup> and GFAP<sup>+</sup> cells. (e) In the ES  
1015 group, Nestin<sup>+</sup> cells increase compared to untreated TBI and sham groups. The fraction of  
1016 GFAP<sup>+</sup> cells among Nestin<sup>+</sup> cells has not been changed, whereas more Nestin-expressing cells  
1017 have been observed within GFAP<sup>+</sup> cells, thereby resulting in more Nestin<sup>+</sup>GFAP<sup>+</sup> cells (and  
1018 consequently fewer Nestin<sup>-</sup>GFAP<sup>+</sup> cells) compared to untreated TBI and sham groups (Figure  
1019 5g,h).  
1020  
1021

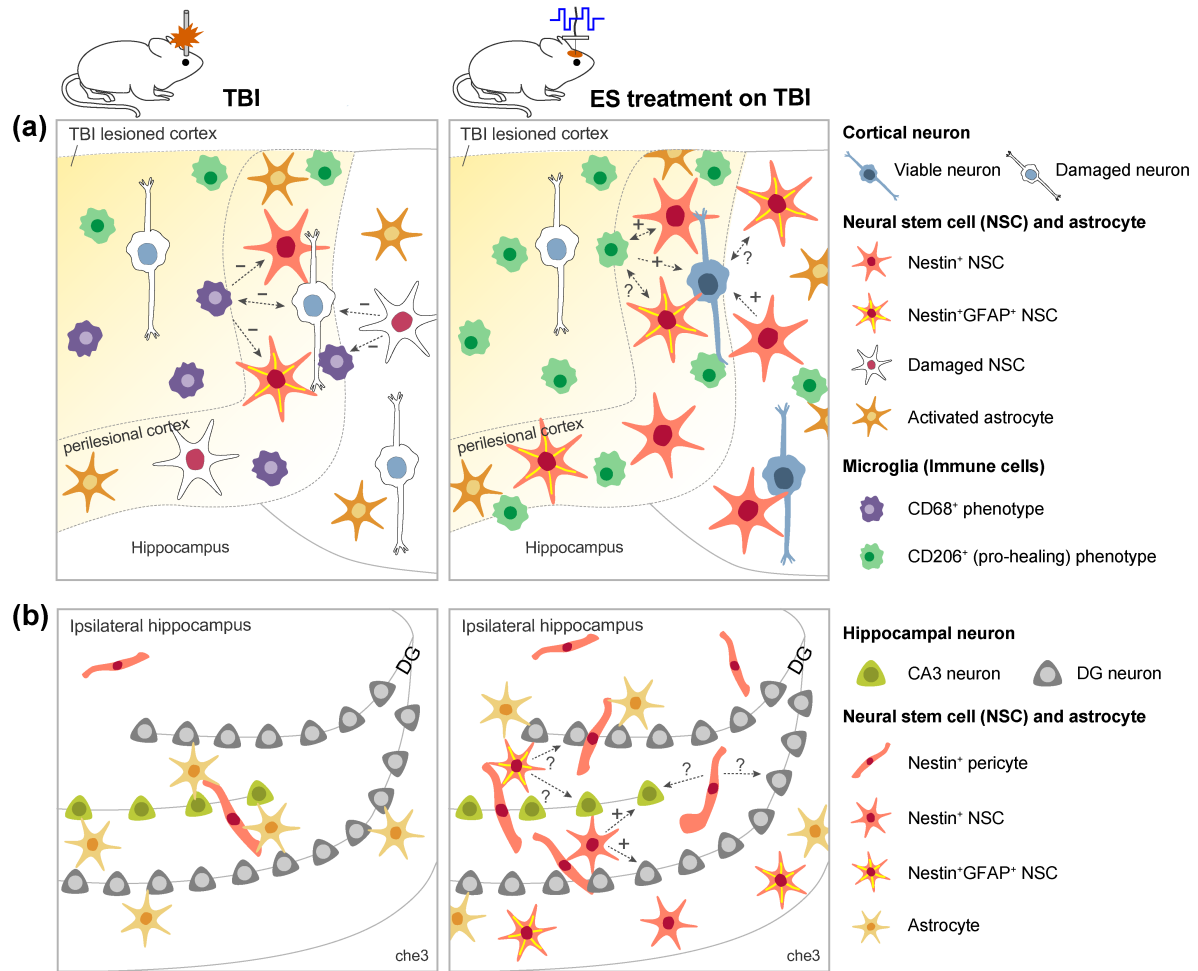

1022  
1023  
1024  
1025  
1026  
1027  
1028

**FIGURE 9. Graphical abstract showing a plausible scenario for intercellular communication among microglia, neural stem cells, and neurons in untreated TBI and ES groups.** The expected influence of cell 1 on cell 2 is indicated in the direction of the dotted arrow. Next to the arrow, supportive or detrimental influences predicted based on literature were indicated by an “+” or “-”, and unknown interactions were indicated by a question mark. (a) and (b) show perilesional cortex and ipsilateral hippocampus, respectively.

1

## 1 Supporting Information for

2

## 3 Enriching neural stem cell and pro-healing glial phenotypes with electrical 4 stimulation after traumatic brain injury in male rats

5 Eunyoung Park,<sup>1</sup> Johnathan G. Lyon<sup>2</sup>, Melissa Alvarado-Velez<sup>3</sup>, Martha I. Betancur<sup>2</sup>, Nassir  
6 Mokarram<sup>2</sup>, Jennifer H. Shin,<sup>1\*</sup> and Ravi V. Bellamkonda<sup>2\*</sup>

7

### 8 Affiliation

9 1 Department of Mechanical Engineering, Korea Advanced Institute of Science and  
10 Technology, 291, Daehak-ro, Daejeon 34141, Republic of Korea.

11 2 Department of Biomedical Engineering, Pratt School of Engineering, Duke University, 101  
12 Science Drive, Durham NC 27705, USA

13 3 The Wallace H. Coulter Department of Biomedical Engineering, Georgia Institute of  
14 Technology, 313 Ferst Dr NW, Atlanta, GA 30332, USA

15

16 \*Email: [j\\_shin@kaist.ac.kr](mailto:j_shin@kaist.ac.kr) (J.H.Shin); [ravi@duke.edu](mailto:ravi@duke.edu) (R.V.Bellamkonda)

17

### 18 Figures

19

20 **FIGURE S1. Cellular response in early phase of TBI.** (a) Function of microglia/macrophage  
21 subtypes and endogenous neural stem cells (NSCs) following TBI. (b) Temporal changes in  
22 inflammatory responses and NSCs after TBI. Within 3 days after TBI, mixed M1/M2  
23 phenotype of microglia/macrophages appears, then M1-phenotype predominates (Kumar,  
24 Alvarez-Croda, Stoica, Faden, & Loane, 2016; Simon et al., 2017; Wang et al., 2013).  
25 Endogenous NSCs appear following injury onset, peaking at 3 days post-TBI then decreasing  
26 (Itoh, Satou, Hashimoto, & Ito, 2005; Yi et al., 2013). Temporally, these immune and neural  
27 stem cell responses overlap.

(a)

| Cells                       |                 | Functions                                                                       |
|-----------------------------|-----------------|---------------------------------------------------------------------------------|
| microglia/<br>macrophages   | M1<br>phenotype | - release pro-inflammatory cytokines<br>- associate with secondary brain damage |
|                             | M2<br>phenotype | - release anti-inflammatory cytokines<br>- repair brain damage                  |
| Endogenous neural stem cell |                 | - have self-renewal properties<br>- differentiate into either neuron or glia    |

(b)

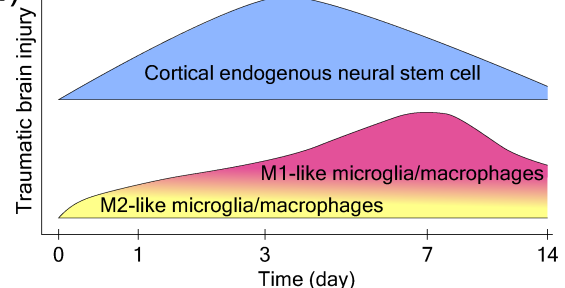

28

29

2

30 **FIGURE S2. Illustration of an implantable ES device used in this study.** (c) PDMS block:  
31 Prepolymer Sylgard 184 and its curing agent were cast at a height of 1mm in a ratio of 10:1.  
32 Next, the block was cut with a punch of 8mm in diameter. A 1.5mm punch was used in the  
33 center of the block to create a hole to insert the electrode. (d) Platinum electrode and hookup  
34 wire were connected by soldering and then encase them with a heat shrink tube. (e) Electrodes  
35 were placed in the hole of the PDMS block then affixed with super glue.

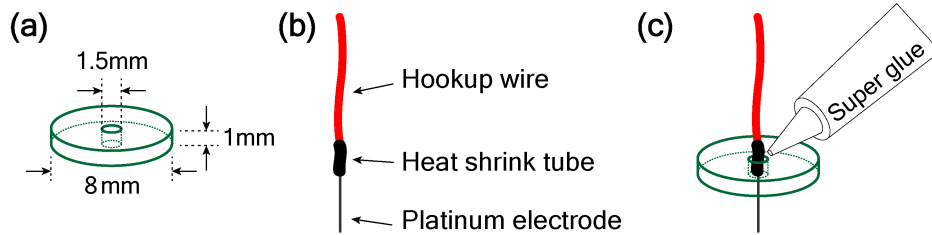

40 **FIGURE S3. Representative gating strategy used to identify CD206<sup>+</sup> immune cell subsets**  
41 **in perilesional brain tissue by flow cytometry.** (a) Based on CD45 intensity, single cells were  
42 distinguished into CD45<sup>low</sup> microglia and CD45<sup>high</sup> leukocytes population. (b) CD206<sup>+</sup>  
43 population was further gated to identify the subsets.

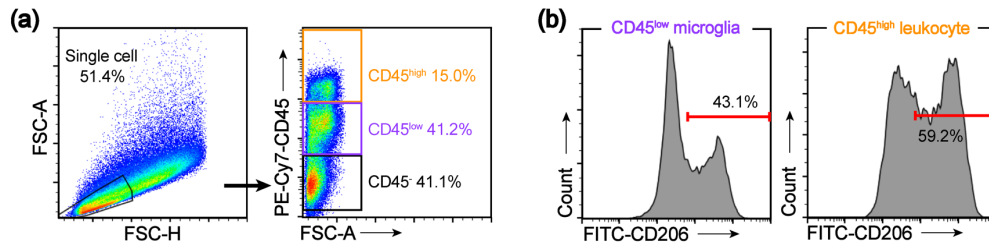

3

49 **FIGURE S4. One-phase exponential decay curve and fitting results.** (a) Illustration of one-  
 50 phase exponential decay curve and its equation, shown on the graph. In this study, the x-axis  
 51 was for a distance from the perilesional rims, and the y-axis was for a mean intensity of Nestin  
 52 or GFAP as shown in Figure 5c and 5d.  $y_0$  is the initial intensity value when  $x$  is zero. The  
 53 value  $k$  in the equation represents the rate of intensity decrease over a distance. Half-life ( $\ln(2)/k$ )  
 54 is a distance required for intensity to reduce to 50 % of span. (b) Fitted function for the mean  
 55 intensity of Nestin and GFAP in TBI, sham, and ES groups. (c) Fitted values of rate constant  
 56 and half-life.

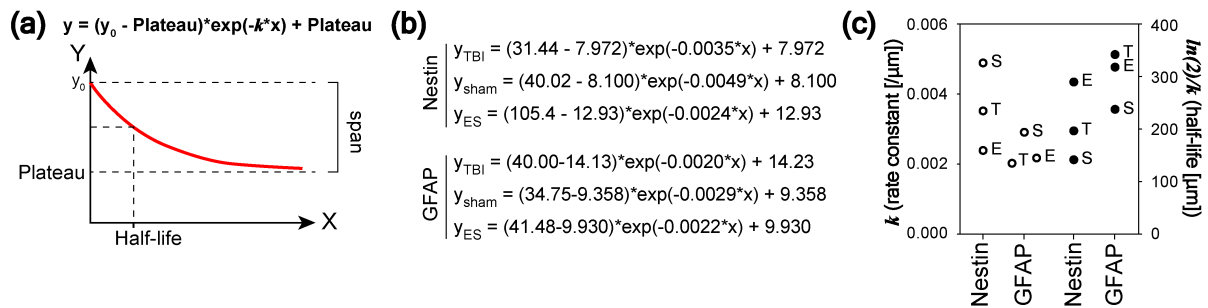

57

58



## 59 **References for Supporting Information**

- 60 Itoh, T., Satou, T., Hashimoto, S., & Ito, H. (2005). Isolation of neural stem cells from  
61 damaged rat cerebral cortex after traumatic brain injury. *Neuroreport*, *16*(15), 1687-  
62 1691. doi:10.1097/01.wnr.0000183330.44112.ab
- 63 Kumar, A., Alvarez-Croda, D. M., Stoica, B. A., Faden, A. I., & Loane, D. J. (2016).  
64 Microglial/Macrophage Polarization Dynamics following Traumatic Brain Injury. *J*  
65 *Neurotrauma*, *33*(19), 1732-1750. doi:10.1089/neu.2015.4268
- 66 Simon, D. W., McGeachy, M. J., Bayir, H., Clark, R. S. B., Loane, D. J., & Kochanek, P. M.  
67 (2017). The far-reaching scope of neuroinflammation after traumatic brain injury.  
68 *Nat Rev Neurol*, *13*(9), 572. doi:10.1038/nrneurol.2017.116
- 69 Wang, G., Zhang, J., Hu, X., Zhang, L., Mao, L., Jiang, X., . . . Chen, J. (2013).  
70 Microglia/macrophage polarization dynamics in white matter after traumatic brain  
71 injury. *J Cereb Blood Flow Metab*, *33*(12), 1864-1874. doi:10.1038/jcbfm.2013.146
- 72 Yi, X., Jin, G., Zhang, X., Mao, W., Li, H., Qin, J., . . . Zhang, F. (2013). Cortical endogenic  
73 neural regeneration of adult rat after traumatic brain injury. *PLoS One*, *8*(7), e70306.  
74 doi:10.1371/journal.pone.0070306  
75
